# Supplementary material for: How Does Mortality Contribute to Lifetime Pension Inequality? Evidence From Five Decades of Swedish Taxation Data
Source: Oxford University Press journal article supplement (doi:10.1215/00703370-10218779), 2022-09-21
Supplement: shi_esm.pdf [file shi_esm.pdf]

Online Appendix

**How Does Mortality Contribute to Lifetime Pension Inequality?  
Evidence from Five Decades of Swedish Taxation Data**

Jiixin Shi and Martin Kolk

## Section 1: Overview of pension systems of the cohorts studied

For the cohorts in our study (those born 1920 and 1925), the first pillar of the Swedish pension systems consisted of a universal guarantee pension (folkpension) and an earnings-related part (Allmän Tilläggspension or ATP). The ATP was more important than the guarantee pension, and it was targeted to contribute 60% of the average of the highest-earning 15 years out of a 30-year working period (30 years is the requirement for full pension). Later, a supplemental part was added to the ATP pension for those with very low ATP pensions. For a more detailed description, see Hagen (2013). The ATP-system was introduced in 1960 (Hagen 2013). The cohorts in this study were entirely covered retroactively. In practice, therefore, full retirement required fewer than 30 years, making the system more generous. Both systems were defined-benefit (DB) systems, funded as PAYGO systems. In the 1980s, political actors saw this pension system as unsustainable, leading to the introduction of a Notional-Defined Contribution (NDC) system which was an early example of pension reforms (Hagen 2013; Palme 2005). The NDC system differs in substantial ways from the pension system we describe above but is not of relevance for the cohorts in our study.

Importantly, together with the public pension, over 90% of all workers in Sweden are also covered by the second-pillar, sector-wide collective agreement pensions negotiated between labor unions and employers (Lindquist and Wadensjö 2009). The characteristics of the collective agreement pensions vary a lot (for our cohorts they were mostly DB plans). The collective agreement pensions could contribute substantially to the pensions of, in particular, high earners and government workers (rising up to 50% of all pension earnings for the highest-earnings decile), as the ATP system had an income ceiling (Hagen 2013). The different collective agreement pensions (second pillar) were introduced gradually over the 1970s and 1980s covering a large share of the labor force (mostly being funded DB schemes that have been gradually replaced with funded defined contribution schemes). They were generally more generous for private sector white-collar workers with higher earnings than blue-collar workers (Olofsson, 1993). A typical target was often that workers would receive 80% of their pre-retirement salary (if they had worked for 30 years) through the combination of all pensions described above, though it could be either higher or lower (Hagen 2013). These pensions are also included in our variables.

Private savings (e.g. capital investments, savings in bank accounts, or housing) for old age in Sweden are usually different from any formal pension-like savings or annuity. In other words, they are not related to monthly payments as from an annuity or a pension, where the total payment is linked to length of life. We do not consider such private savings in this study, as it is not possible to distinguish them from overall wealth. Unlike pension, wealth will often be bequeathed to children. However, we included private pension incomes, which are often not lifetime annuities but paid out as temporary annuities (Palmer 2008). It is noteworthy that such private pension incomes account only a limited share of the total pension payments at the population level (Hagen 2013). In 2018, private pensions constituted less than 2% of all pension payments for cohorts born before 1928 (Pensionsmyndigheten 2020). Private pensions are arguably more important at younger ages, as they are mostly paid out in a short period of 5 or 10 years (Palmer 2008). Hence, the small amount and the short payout length together suggest that private pensions only have a minor impact on our overall pension variable.

## References

- Hagen, J. (2013). *A History of the Swedish Pension System*. Department of Economics, Uppsala University.
- Lindquist, G. S. & Wadensjö, E. (2009). Retirement, Pensions and Work in Sweden. *The Geneva Papers on Risk and Insurance-Issues and Practice*, 34, 578–590.
- Olofsson, G. (1993). Det svenska pensionssystemet 1913–1993: historia, struktur och konflikter [The Swedish pension system 1913–1993: history, structure and conflicts]. *Arkiv för studier i arbetarrörelsens historia*, (58–59), 29–84
- Palme, J. (2005). Features of the Swedish Pension Reform. *The Japanese Journal of Social Security Policy*, 4, 42–53.
- Palmer, E. (2008). *The market for retirement products in Sweden* (Policy Research Working Paper No. WPS 4748). Washington, DC: World Bank Group.
- Pensionsmyndigheten. (2020). *Swedish Pension Agency on Source of pension by cohort for the year 2018* (Table). Stockholm, Sweden: Pensionsmyndigheten, Pension Statistics. Available from <https://www.pensionsmyndigheten.se/statistik/pensionsstatistik/?domain=tab-6&report=report-6-1>

## Section 2: Tables

**Table A1** Percentages of men with years of zero earnings at ages 50–59

|              | Number of Years of Zero Earnings |      |     |     |     |     |     |     |     |     |     | <i>N</i> |
|--------------|----------------------------------|------|-----|-----|-----|-----|-----|-----|-----|-----|-----|----------|
|              | 0                                | 1    | 2   | 3   | 4   | 5   | 6   | 7   | 8   | 9   | 10  |          |
| 1920 Cohort  |                                  |      |     |     |     |     |     |     |     |     |     |          |
| Total        | 86.6                             | 9.3  | 1.7 | 0.8 | 0.4 | 0.4 | 0.3 | 0.4 | 0.1 | 0.0 | 0.1 | 51,088   |
| By Education |                                  |      |     |     |     |     |     |     |     |     |     |          |
| Primary      | 85.7                             | 9.4  | 1.9 | 0.9 | 0.5 | 0.5 | 0.4 | 0.5 | 0.1 | 0.0 | 0.1 | 34,757   |
| Secondary    | 87.9                             | 9.5  | 1.3 | 0.7 | 0.2 | 0.1 | 0.1 | 0.1 | 0.1 | 0.0 | 0.0 | 13,086   |
| Tertiary     | 91.1                             | 7.2  | 0.8 | 0.2 | 0.3 | 0.1 | 0.0 | 0.1 | 0.0 | 0.0 | 0.0 | 3,245    |
| By Earnings  |                                  |      |     |     |     |     |     |     |     |     |     |          |
| Lowest       | 61.6                             | 19.1 | 7.4 | 3.9 | 2.1 | 1.8 | 1.4 | 1.8 | 0.5 | 0.1 | 0.3 | 10,218   |
| Second       | 90.1                             | 9.4  | 0.4 | 0.1 | 0.0 | 0.0 | 0.0 | 0.0 | 0.0 | 0.0 | 0.0 | 10,217   |
| Third        | 93.2                             | 6.6  | 0.1 | 0.1 | 0.0 | 0.0 | 0.0 | 0.0 | 0.0 | 0.0 | 0.0 | 10,218   |
| Fourth       | 94.2                             | 5.6  | 0.1 | 0.0 | 0.0 | 0.0 | 0.0 | 0.0 | 0.0 | 0.0 | 0.0 | 10,217   |
| Highest      | 93.7                             | 5.9  | 0.3 | 0.0 | 0.0 | 0.0 | 0.0 | 0.0 | 0.0 | 0.0 | 0.0 | 10,218   |
| 1925 Cohort  |                                  |      |     |     |     |     |     |     |     |     |     |          |
| Total        | 97.1                             | 1.5  | 0.8 | 0.2 | 0.1 | 0.1 | 0.0 | 0.0 | 0.0 | 0.0 | 0.0 | 40,368   |
| By Education |                                  |      |     |     |     |     |     |     |     |     |     |          |
| Primary      | 96.6                             | 1.6  | 1.1 | 0.3 | 0.1 | 0.1 | 0.0 | 0.1 | 0.0 | 0.0 | 0.1 | 25,486   |
| Secondary    | 97.9                             | 1.2  | 0.4 | 0.2 | 0.2 | 0.1 | 0.0 | 0.0 | 0.0 | 0.0 | 0.0 | 11,328   |
| Tertiary     | 98.3                             | 1.2  | 0.2 | 0.2 | 0.1 | 0.1 | 0.0 | 0.0 | 0.0 | 0.0 | 0.0 | 3,554    |
| By Earnings  |                                  |      |     |     |     |     |     |     |     |     |     |          |
| Lowest       | 87.9                             | 5.4  | 3.9 | 1.1 | 0.5 | 0.4 | 0.1 | 0.2 | 0.1 | 0.1 | 0.2 | 8,074    |
| Second       | 99.2                             | 0.7  | 0.1 | 0.0 | 0.0 | 0.0 | 0.0 | 0.0 | 0.0 | 0.0 | 0.0 | 8,073    |
| Third        | 99.7                             | 0.2  | 0.0 | 0.0 | 0.0 | 0.0 | 0.0 | 0.0 | 0.0 | 0.0 | 0.0 | 8,074    |
| Fourth       | 99.6                             | 0.3  | 0.1 | 0.0 | 0.0 | 0.0 | 0.0 | 0.0 | 0.0 | 0.0 | 0.0 | 8,073    |
| Highest      | 99.2                             | 0.6  | 0.0 | 0.1 | 0.0 | 0.0 | 0.0 | 0.0 | 0.0 | 0.0 | 0.0 | 8,074    |

*Source:* Authors' calculation based on linked administrative data from Statistics Sweden.

**Table A2** Percentages of women with years of zero earnings at ages 50–59

|              | Number of Years of Zero Earnings |      |      |     |     |     |     |     |      |      |      | <i>N</i> |
|--------------|----------------------------------|------|------|-----|-----|-----|-----|-----|------|------|------|----------|
|              | 0                                | 1    | 2    | 3   | 4   | 5   | 6   | 7   | 8    | 9    | 10   |          |
| 1920 Cohort  |                                  |      |      |     |     |     |     |     |      |      |      |          |
| Total        | 57.8                             | 10.5 | 4.2  | 3.2 | 3.0 | 2.9 | 3.0 | 2.6 | 2.2  | 2.2  | 8.3  | 52,624   |
| By Education |                                  |      |      |     |     |     |     |     |      |      |      |          |
| Primary      | 54.4                             | 10.5 | 4.4  | 3.5 | 3.2 | 3.2 | 3.3 | 3.0 | 2.5  | 2.5  | 9.4  | 41,128   |
| Secondary    | 67.2                             | 10.5 | 3.5  | 2.5 | 2.4 | 2.1 | 2.1 | 1.5 | 1.4  | 1.5  | 5.3  | 9,363    |
| Tertiary     | 81.3                             | 9.0  | 2.3  | 1.4 | 1.5 | 0.7 | 0.6 | 1.0 | 0.7  | 0.6  | 1.2  | 2,133    |
| By Earnings  |                                  |      |      |     |     |     |     |     |      |      |      |          |
| Lowest       | 3.4                              | 3.0  | 2.8  | 3.2 | 4.0 | 5.1 | 6.7 | 8.6 | 10.4 | 11.2 | 41.6 | 10,525   |
| Second       | 33.0                             | 16.2 | 10.4 | 9.4 | 9.0 | 8.7 | 7.9 | 4.6 | 0.6  | 0.0  | 0.0  | 10,525   |
| Third        | 72.0                             | 16.9 | 5.6  | 2.9 | 1.6 | 0.6 | 0.3 | 0.0 | 0.0  | 0.0  | 0.0  | 10,524   |
| Fourth       | 86.9                             | 10.5 | 1.6  | 0.7 | 0.2 | 0.1 | 0.0 | 0.0 | 0.0  | 0.0  | 0.0  | 10,525   |
| Highest      | 93.7                             | 5.7  | 0.4  | 0.1 | 0.0 | 0.0 | 0.0 | 0.0 | 0.0  | 0.0  | 0.0  | 10,525   |
| 1925 Cohort  |                                  |      |      |     |     |     |     |     |      |      |      |          |
| Total        | 79.2                             | 4.5  | 3.0  | 1.9 | 1.5 | 1.2 | 1.1 | 1.0 | 1.0  | 1.2  | 4.4  | 41,706   |
| By Education |                                  |      |      |     |     |     |     |     |      |      |      |          |
| Primary      | 76.2                             | 4.9  | 3.4  | 2.1 | 1.6 | 1.4 | 1.3 | 1.1 | 1.2  | 1.4  | 5.3  | 31,049   |
| Secondary    | 86.0                             | 3.9  | 2.0  | 1.2 | 1.1 | 0.7 | 0.7 | 0.7 | 0.6  | 0.7  | 2.4  | 8,300    |
| Tertiary     | 94.4                             | 1.9  | 0.8  | 0.6 | 0.3 | 0.5 | 0.4 | 0.1 | 0.2  | 0.2  | 0.6  | 2,357    |
| By Earnings  |                                  |      |      |     |     |     |     |     |      |      |      |          |
| Lowest       | 23.0                             | 8.2  | 6.5  | 6.9 | 6.1 | 5.5 | 5.6 | 4.7 | 5.1  | 6.1  | 22.2 | 8,341    |
| Second       | 78.5                             | 10.2 | 7.4  | 2.1 | 1.1 | 0.5 | 0.1 | 0.0 | 0.0  | 0.0  | 0.0  | 8,341    |
| Third        | 95.9                             | 3.1  | 0.7  | 0.2 | 0.1 | 0.0 | 0.0 | 0.0 | 0.0  | 0.0  | 0.0  | 8,341    |
| Fourth       | 99.0                             | 0.8  | 0.2  | 0.0 | 0.0 | 0.0 | 0.0 | 0.0 | 0.0  | 0.0  | 0.0  | 8,341    |
| Highest      | 99.5                             | 0.4  | 0.0  | 0.0 | 0.0 | 0.0 | 0.0 | 0.0 | 0.0  | 0.0  | 0.0  | 8,342    |

*Source:* Authors' calculation based on linked administrative data from Statistics Sweden.

**Table A3** Percentages of 50-year-old individuals dying before age 60

|              | Men         |             | Women       |             |
|--------------|-------------|-------------|-------------|-------------|
|              | 1920 Cohort | 1925 Cohort | 1920 Cohort | 1925 Cohort |
| Total        | 7.4         | 7.6         | 4.1         | 4.0         |
| By Education |             |             |             |             |
| Primary      | 7.9         | 8.2         | 4.2         | 4.2         |
| Secondary    | 6.8         | 7.1         | 3.7         | 3.5         |
| Tertiary     | 4.8         | 4.9         | 3.3         | 3.2         |
| By Earnings  |             |             |             |             |
| Lowest       | 13.8        | 11.8        | 5.7         | 5.2         |
| Second       | 7.2         | 7.5         | 5.3         | 4.9         |
| Third        | 5.3         | 6.5         | 3.6         | 3.7         |
| Fourth       | 5.2         | 5.9         | 3.2         | 2.9         |
| Highest      | 4.9         | 6.2         | 2.5         | 3.3         |

*Notes:* In the main analysis, individuals were selected conditional upon surviving to age 60. Earnings quintiles were classified based on average year income between ages 50 and 59. Here, we used the same earnings cut-points as those used in the main analysis. For individuals who died between 51 and 59, we used average yearly earnings between age 50 and the age in the year prior to death.

*Source:* Authors' calculation based on linked administrative data from Statistics Sweden.

**Table A4** Mean and standard deviation of average yearly earnings between ages 50 and 59

|              | Men         |       |             |       | Women       |       |             |       |
|--------------|-------------|-------|-------------|-------|-------------|-------|-------------|-------|
|              | 1920 Cohort |       | 1925 Cohort |       | 1920 Cohort |       | 1925 Cohort |       |
|              | Mean        | SD    | Mean        | SD    | Mean        | SD    | Mean        | SD    |
| Total        | 264.1       | 165.1 | 268.1       | 148.7 | 108.8       | 91.9  | 138.7       | 90.1  |
| By Education |             |       |             |       |             |       |             |       |
| Primary      | 222.1       | 109.0 | 223.8       | 98.4  | 93.6        | 78.0  | 122.4       | 78.5  |
| Secondary    | 315.3       | 183.1 | 306.1       | 149.6 | 144.0       | 98.1  | 165.0       | 90.5  |
| Tertiary     | 507.2       | 279.4 | 464.5       | 230.6 | 249.1       | 139.7 | 260.4       | 114.2 |
| By Earnings  |             |       |             |       |             |       |             |       |
| Lowest       | 116.6       | 44.9  | 127.4       | 44.8  | 4.2         | 5.7   | 19.7        | 19.5  |
| Second       | 202.7       | 12.7  | 210.1       | 10.8  | 43.3        | 14.6  | 86.3        | 15.0  |
| Third        | 239.0       | 9.7   | 243.6       | 9.6   | 95.9        | 15.0  | 133.5       | 13.3  |
| Fourth       | 284.1       | 18.3  | 289.3       | 18.8  | 153.0       | 18.7  | 185.9       | 16.4  |
| Highest      | 478.0       | 247.6 | 470.0       | 207.5 | 247.8       | 69.2  | 268.1       | 60.4  |

*Notes:* Means and standard deviations are shown in SEK 1,000  $\approx$  US\$125. Inflation was adjusted to the 2018 level.

*Source:* Authors' calculation based on linked administrative data from Statistics Sweden.

**Table A5** Three-way decompositions of differences in lifetime pensions between primary and secondary education and between secondary and tertiary education

|                                         | Men                                           |        |                                               |        | Women                                         |       |                                               |       |
|-----------------------------------------|-----------------------------------------------|--------|-----------------------------------------------|--------|-----------------------------------------------|-------|-----------------------------------------------|-------|
|                                         | 1920 Cohort                                   |        | 1925 Cohort                                   |        | 1920 Cohort                                   |       | 1925 Cohort                                   |       |
|                                         | Lifetime Pension (in SEK 1,000 <sup>a</sup> ) | %      | Lifetime Pension (in SEK 1,000 <sup>a</sup> ) | %      | Lifetime Pension (in SEK 1,000 <sup>a</sup> ) | %     | Lifetime Pension (in SEK 1,000 <sup>a</sup> ) | %     |
| <b>Primary vs. Secondary Education</b>  |                                               |        |                                               |        |                                               |       |                                               |       |
| Mortality effect                        | 261.1                                         | 24.0   | 305.5                                         | 26.9   | 136.8                                         | 18.3  | 159.7                                         | 22.0  |
| Redistribution effect                   | -1,047.0                                      | -96.1  | -895.4                                        | -78.8  | -636.6                                        | -85.2 | -513.5                                        | -70.8 |
| Earnings effect                         | 1,875.9                                       | 172.1  | 1,725.7                                       | 151.9  | 1,247.1                                       | 166.9 | 1,079.4                                       | 148.8 |
| Total                                   | 1,090.0                                       | 100.0  | 1,135.8                                       | 100.0  | 747.2                                         | 100.0 | 725.6                                         | 100.0 |
| <b>Secondary vs. Tertiary Education</b> |                                               |        |                                               |        |                                               |       |                                               |       |
| Mortality effect                        | 341.6                                         | 18.4   | 519.6                                         | 25.8   | 284.0                                         | 18.0  | 243.4                                         | 14.2  |
| Redistribution effect                   | -2,598.8                                      | -140.1 | -2,099.3                                      | -104.4 | -1,457.9                                      | -92.4 | -1,062.3                                      | -61.8 |
| Earnings effect                         | 4,112.0                                       | 221.7  | 3,589.9                                       | 178.6  | 2,751.6                                       | 174.4 | 2,538.3                                       | 147.6 |
| Total                                   | 1,854.7                                       | 100.0  | 2,010.3                                       | 100.0  | 1,577.8                                       | 100.0 | 1,719.4                                       | 100.0 |

*Notes:* Mortality effect, redistribution effect, and earnings effect refer to the parts of total lifetime pension differences that are attributable to differences in mortality, differences in the differences between pension income and labor earnings, and differences in labor earnings, respectively.

*Source:* Authors' calculation based on linked administrative data from Statistics Sweden.

<sup>a</sup> Units for absolute differences are in SEK 1,000  $\approx$  US\$125.



**Table A6** Three-way decompositions of differences in lifetime pensions between earnings income quintiles

|                                    | Men                                           |        |                                               |        | Women                                         |        |                                               |        |
|------------------------------------|-----------------------------------------------|--------|-----------------------------------------------|--------|-----------------------------------------------|--------|-----------------------------------------------|--------|
|                                    | 1920 Cohort                                   |        | 1925 Cohort                                   |        | 1920 Cohort                                   |        | 1925 Cohort                                   |        |
|                                    | Lifetime Pension (in SEK 1,000 <sup>a</sup> ) | %      | Lifetime Pension (in SEK 1,000 <sup>a</sup> ) | %      | Lifetime Pension (in SEK 1,000 <sup>a</sup> ) | %      | Lifetime Pension (in SEK 1,000 <sup>a</sup> ) | %      |
| <b>Lowest vs. Third Quintiles</b>  |                                               |        |                                               |        |                                               |        |                                               |        |
| Mortality effect                   | 368.8                                         | 27.8   | 374.9                                         | 27.6   | 8.7                                           | 1.4    | 66.9                                          | 7.4    |
| Redistribution effect              | -1,346.5                                      | -101.5 | -1,311.0                                      | -96.4  | -1,629.4                                      | -255.9 | -2,033.6                                      | -224.8 |
| Earnings effect                    | 2,304.1                                       | 173.7  | 2,295.8                                       | 168.8  | 2,257.4                                       | 354.5  | 2,871.2                                       | 317.4  |
| Total                              | 1,326.4                                       | 100.0  | 1,359.7                                       | 100.0  | 636.8                                         | 100.0  | 904.5                                         | 100.0  |
| <b>Second vs. Fourth Quintiles</b> |                                               |        |                                               |        |                                               |        |                                               |        |
| Mortality effect                   | 288.1                                         | 27.6   | 317.7                                         | 28.1   | 162.4                                         | 14.2   | 160.9                                         | 12.7   |
| Redistribution effect              | -881.5                                        | -84.5  | -851.0                                        | -75.4  | -1,644.1                                      | -143.8 | -1,337.0                                      | -105.9 |
| Earnings effect                    | 1,636.0                                       | 156.9  | 1,662.2                                       | 147.2  | 2,625.0                                       | 229.6  | 2,438.5                                       | 193.2  |
| Total                              | 1,042.6                                       | 100.0  | 1,128.9                                       | 100.0  | 1,143.3                                       | 100.0  | 1,262.3                                       | 100.0  |
| <b>Third vs. Highest Quintiles</b> |                                               |        |                                               |        |                                               |        |                                               |        |
| Mortality effect                   | 425.9                                         | 17.7   | 543.4                                         | 19.8   | 105.7                                         | 5.5    | 88.6                                          | 4.5    |
| Redistribution effect              | -3,053.5                                      | -127.1 | -2,798.9                                      | -102.1 | -1,982.5                                      | -102.9 | -1,618.1                                      | -83.0  |
| Earnings effect                    | 5,029.6                                       | 209.4  | 4,996.4                                       | 182.3  | 3,803.4                                       | 197.4  | 3,478.8                                       | 178.5  |
| Total                              | 2,402.0                                       | 100.0  | 2,740.9                                       | 100.0  | 1,926.5                                       | 100.0  | 1,949.3                                       | 100.0  |

*Notes:* Mortality effect, redistribution effect, and earnings effect refer to the parts of total lifetime pension differences that are attributable to differences in mortality, differences in the differences between pension income and labor earnings, and differences in labor earnings, respectively.

*Source:* Authors' calculation based on linked administrative data from Statistics Sweden.

<sup>a</sup> Units for absolute differences are in SEK 1,000  $\approx$  US\$125.

**Table A7** Three-way decompositions of differences in lifetime pensions between primary and tertiary education and between the lowest and highest earnings quintiles, with 2% discount rate

|                                       | Men                                           |        |                                               |        | Women                                         |        |                                               |        |
|---------------------------------------|-----------------------------------------------|--------|-----------------------------------------------|--------|-----------------------------------------------|--------|-----------------------------------------------|--------|
|                                       | 1920 Cohort                                   |        | 1925 Cohort                                   |        | 1920 Cohort                                   |        | 1925 Cohort                                   |        |
|                                       | Lifetime Pension (in SEK 1,000 <sup>a</sup> ) | %      | Lifetime Pension (in SEK 1,000 <sup>a</sup> ) | %      | Lifetime Pension (in SEK 1,000 <sup>a</sup> ) | %      | Lifetime Pension (in SEK 1,000 <sup>a</sup> ) | %      |
| <b>Primary vs. Tertiary Education</b> |                                               |        |                                               |        |                                               |        |                                               |        |
| Mortality effect                      | 417.1                                         | 19.4   | 556.8                                         | 24.8   | 271.7                                         | 16.7   | 265.1                                         | 15.6   |
| Redistribution effect                 | -2,980.8                                      | -138.8 | -2,471.1                                      | -110.1 | -1,704.0                                      | -104.5 | -1,312.5                                      | -77.1  |
| Earnings effect                       | 4,711.3                                       | 219.4  | 4,159.0                                       | 185.3  | 3,062.9                                       | 187.8  | 2,748.7                                       | 161.6  |
| Total                                 | 2,147.6                                       | 100.0  | 2,244.7                                       | 100.0  | 1,630.6                                       | 100.0  | 1,701.3                                       | 100.0  |
| <b>Lowest vs. Highest Quintiles</b>   |                                               |        |                                               |        |                                               |        |                                               |        |
| Mortality effect                      | 618.5                                         | 22.6   | 688.8                                         | 23.1   | 67.2                                          | 3.5    | 108.7                                         | 5.2    |
| Redistribution effect                 | -3,573.7                                      | -130.6 | -3,357.9                                      | -112.5 | -2,886.9                                      | -152.5 | -2,894.3                                      | -138.0 |
| Earnings effect                       | 5,691.8                                       | 208.0  | 5,653.6                                       | 189.4  | 4,712.3                                       | 249.0  | 4,883.0                                       | 232.8  |
| Total                                 | 2,736.6                                       | 100.0  | 2,984.5                                       | 100.0  | 1,892.5                                       | 100.0  | 2,097.4                                       | 100.0  |

*Notes:* Mortality effect, redistribution effect, and earnings effect refer to the parts of total lifetime pension differences that are attributable to differences in mortality, differences in the differences between pension income and labor earnings, and differences in labor earnings, respectively.

*Source:* Authors' calculation based on linked administrative data from Statistics Sweden.

<sup>a</sup> Units for absolute differences are in SEK 1,000  $\approx$  US\$125.

**Table A8** Lifetime pension inequality between primary and tertiary education under policy and mortality scenarios, 1925 cohort

|                                       | Men                                |          |                     |          | Women                              |          |                     |          |
|---------------------------------------|------------------------------------|----------|---------------------|----------|------------------------------------|----------|---------------------|----------|
|                                       | Absolute Difference                |          | Relative Difference |          | Absolute Difference                |          | Relative Difference |          |
|                                       | Diff. (in SEK 1,000 <sup>a</sup> ) | % Change | Ratio               | % Change | Diff. (in SEK 1,000 <sup>a</sup> ) | % Change | Ratio               | % Change |
| Observed                              | 3,146.0                            | —        | 2.05                | —        | 2,444.9                            | —        | 2.00                | —        |
| Uniform Increase in Retirement Age    |                                    |          |                     |          |                                    |          |                     |          |
| One-year increase                     | 3,006.8                            | -4.4     | 2.07                | 0.7      | 2,345.3                            | -4.1     | 2.01                | 0.3      |
| Three-year increase                   | 2,730.6                            | -13.2    | 2.10                | 2.2      | 2,148.5                            | -12.1    | 2.02                | 0.8      |
| Differential Retirement Ages          |                                    |          |                     |          |                                    |          |                     |          |
| Primary education one year earlier    | 3,009.9                            | -4.3     | 1.96                | -4.4     | 2,366.0                            | -3.2     | 1.94                | -3.1     |
| Primary education three years earlier | 2,777.0                            | -11.7    | 1.83                | -11.0    | 2,232.4                            | -8.7     | 1.84                | -8.0     |
| Tertiary education one year later     | 2,836.5                            | -9.8     | 1.95                | -5.0     | 2,233.9                            | -8.6     | 1.91                | -4.3     |
| Tertiary education three years later  | 2,230.8                            | -29.1    | 1.75                | -14.9    | 1,817.7                            | -25.7    | 1.74                | -12.8    |
| Pension System More Generous          |                                    |          |                     |          |                                    |          |                     |          |
| Yearly pension SEK 10,000 more to all | 3,180.0                            | 1.1      | 2.00                | -2.7     | 2,471.0                            | 1.1      | 1.92                | -4.1     |
| Yearly pension SEK 20,000 more to all | 3,213.9                            | 2.2      | 1.95                | -5.1     | 2,497.0                            | 2.1      | 1.85                | -7.5     |
| Pension System Less Generous          |                                    |          |                     |          |                                    |          |                     |          |
| Yearly pension SEK 10,000 less to all | 3,112.0                            | -1.1     | 2.12                | 3.1      | 2,418.9                            | -1.1     | 2.10                | 5.0      |
| Yearly pension SEK 20,000 less to all | 3,078.1                            | -2.2     | 2.19                | 6.7      | 2,392.9                            | -2.1     | 2.23                | 11.4     |
| Raising Minimum Pension               |                                    |          |                     |          |                                    |          |                     |          |
| Minimum pension to SEK 80,000         | 3,143.9                            | -0.1     | 2.04                | -0.3     | 2,371.0                            | -3.0     | 1.93                | -3.5     |
| Minimum pension to SEK 100,000        | 3,130.2                            | -0.5     | 2.03                | -0.9     | 2,253.1                            | -7.8     | 1.83                | -8.4     |
| Mortality Reduction Scenarios         |                                    |          |                     |          |                                    |          |                     |          |
| 10% less for all                      | 3,263.5                            | 3.7      | 2.04                | -0.8     | 2,523.8                            | 3.2      | 1.99                | -0.3     |
| Primary 10% less, tertiary 0% less    | 2,986.2                            | -5.1     | 1.95                | -5.1     | 2,349.2                            | -3.9     | 1.93                | -3.8     |
| Primary 0% less, tertiary 10% less    | 3,423.3                            | 8.8      | 2.14                | 4.5      | 2,619.6                            | 7.1      | 2.07                | 3.6      |

*Notes:* For the 1925 cohort, the observed lifetime pensions are SEK 2,992,800 for men with primary education, SEK 6,138,800 for men with tertiary education, SEK 2,443,500 for women with primary education, and SEK 4,888,500 for women with tertiary education.

*Source:* Authors' calculation based on linked administrative data from Statistics Sweden.

<sup>a</sup> Units for absolute differences are in SEK 1,000  $\approx$  US\$125.

**Table A9** Lifetime pension inequality between the lowest and the highest earnings quintiles under policy and mortality scenarios, 1920 cohort

|                                                    | Men                                |          |                     |          | Women                              |          |                     |          |
|----------------------------------------------------|------------------------------------|----------|---------------------|----------|------------------------------------|----------|---------------------|----------|
|                                                    | Absolute Difference                |          | Relative Difference |          | Absolute Difference                |          | Relative Difference |          |
|                                                    | Diff. (in SEK 1,000 <sup>a</sup> ) | % change | Ratio               | % change | Diff. (in SEK 1,000 <sup>a</sup> ) | % change | Ratio               | % change |
| Observed                                           | 3,728.3                            | —        | 3.32                | —        | 2,563.3                            | —        | 2.73                | —        |
| Uniform Increase in Retirement Age                 |                                    |          |                     |          |                                    |          |                     |          |
| One-year increase                                  | 3,545.4                            | -4.9     | 3.36                | 1.0      | 2,456.6                            | -4.2     | 2.74                | 0.5      |
| Three-year increase                                | 3,184.7                            | -14.6    | 3.43                | 3.2      | 2,244.1                            | -12.5    | 2.77                | 1.5      |
| Differential Retirement Ages                       |                                    |          |                     |          |                                    |          |                     |          |
| Lowest quintile one year earlier                   | 3,671.0                            | -1.5     | 3.21                | -3.4     | 2,505.5                            | -2.3     | 2.63                | -3.8     |
| Lowest quintile three years earlier                | 3,564.3                            | -4.4     | 3.01                | -9.3     | 2,415.1                            | -5.8     | 2.48                | -9.1     |
| Highest quintile one year later                    | 3,444.3                            | -7.6     | 3.14                | -5.3     | 2,383.8                            | -7.0     | 2.61                | -4.4     |
| Highest quintile three years later                 | 2,890.3                            | -22.5    | 2.80                | -15.7    | 2,029.0                            | -20.8    | 2.37                | -13.2    |
| Pension System More Generous                       |                                    |          |                     |          |                                    |          |                     |          |
| Yearly pension SEK 10,000 more to all              | 3,772.6                            | 1.2      | 3.12                | -6.1     | 2,571.7                            | 0.3      | 2.49                | -8.8     |
| Yearly pension SEK 20,000 more to all              | 3,817.0                            | 2.4      | 2.95                | -11.2    | 2,580.2                            | 0.7      | 2.31                | -15.5    |
| Pension System Less Generous                       |                                    |          |                     |          |                                    |          |                     |          |
| Yearly pension SEK 10,000 less to all              | 3,684.0                            | -1.2     | 3.57                | 7.6      | 2,554.9                            | -0.3     | 3.07                | 12.4     |
| Yearly pension SEK 20,000 less to all              | 3,639.6                            | -2.4     | 3.90                | 17.4     | 2,546.5                            | -0.7     | 3.57                | 30.9     |
| Raising Minimum Pension                            |                                    |          |                     |          |                                    |          |                     |          |
| Minimum pension to SEK 80,000                      | 3,673.5                            | -1.5     | 3.20                | -3.7     | 2,233.1                            | -12.9    | 2.23                | -18.5    |
| Minimum pension to SEK 100,000                     | 3,582.3                            | -3.9     | 3.03                | -8.9     | 1,890.7                            | -26.2    | 1.87                | -31.5    |
| Mortality Reduction Scenarios                      |                                    |          |                     |          |                                    |          |                     |          |
| 10% less for all                                   | 3,892.2                            | 4.4      | 3.28                | -1.2     | 2,652.6                            | 3.5      | 2.72                | -0.4     |
| Lowest quintile 10% less, highest quintile 0% less | 3,629.6                            | -2.6     | 3.13                | -5.8     | 2,501.0                            | -2.4     | 2.62                | -4.0     |
| Lowest quintile 0% less, highest quintile 10% less | 3,990.9                            | 7.0      | 3.48                | 4.9      | 2,714.9                            | 5.9      | 2.83                | 3.7      |

*Notes:* For the 1920 cohort, the observed lifetime pensions are SEK 1,606,600 for men in the lowest quintile, SEK 5,334,900 for men in the highest quintile, SEK 1,481,000 for women in the lowest quintile, and SEK 4,044,400 for women in the highest quintile.

*Source:* Authors' calculation based on linked administrative data from Statistics Sweden.

<sup>a</sup> Units for absolute differences are in SEK 1,000  $\approx$  US\$125.

**Table A10** Lifetime pension inequality between the lowest and the highest earnings quintiles under policy and mortality scenarios, 1925 cohort

|                                                    | Men                                |          |                     |          | Women                              |          |                     |          |
|----------------------------------------------------|------------------------------------|----------|---------------------|----------|------------------------------------|----------|---------------------|----------|
|                                                    | Absolute Difference                |          | Relative Difference |          | Absolute Difference                |          | Relative Difference |          |
|                                                    | Diff. (in SEK 1,000 <sup>a</sup> ) | % change | Ratio               | % change | Diff. (in SEK 1,000 <sup>a</sup> ) | % change | Ratio               | % change |
| Observed                                           | 4,100.6                            | —        | 3.14                | —        | 2,853.8                            | —        | 2.76                | —        |
| Uniform Increase in Retirement Age                 |                                    |          |                     |          |                                    |          |                     |          |
| One-year increase                                  | 3,912.7                            | -4.6     | 3.18                | 1.1      | 2,737.6                            | -4.1     | 2.77                | 0.5      |
| Three-year increase                                | 3,540.3                            | -13.7    | 3.25                | 3.4      | 2,507.3                            | -12.1    | 2.80                | 1.5      |
| Differential Retirement Ages                       |                                    |          |                     |          |                                    |          |                     |          |
| Lowest quintile one year earlier                   | 4,025.6                            | -1.8     | 3.02                | -3.8     | 2,796.3                            | -2.0     | 2.67                | -3.4     |
| Lowest quintile three years earlier                | 3,894.0                            | -5.0     | 2.84                | -9.7     | 2,704.9                            | -5.2     | 2.53                | -8.4     |
| Highest quintile one year later                    | 3,796.6                            | -7.4     | 2.98                | -5.1     | 2,659.9                            | -6.8     | 2.64                | -4.3     |
| Highest quintile three years later                 | 3,201.3                            | -21.9    | 2.67                | -15.0    | 2,277.1                            | -20.2    | 2.40                | -12.9    |
| Pension System More Generous                       |                                    |          |                     |          |                                    |          |                     |          |
| Yearly pension SEK 10,000 more to all              | 4,146.9                            | 1.1      | 2.98                | -5.3     | 2,866.5                            | 0.4      | 2.53                | -8.2     |
| Yearly pension SEK 20,000 more to all              | 4,193.2                            | 2.3      | 2.84                | -9.8     | 2,879.1                            | 0.9      | 2.36                | -14.5    |
| Pension System Less Generous                       |                                    |          |                     |          |                                    |          |                     |          |
| Yearly pension SEK 10,000 less to all              | 4,054.3                            | -1.1     | 3.35                | 6.5      | 2,841.2                            | -0.4     | 3.07                | 11.2     |
| Yearly pension SEK 20,000 less to all              | 4,008.0                            | -2.3     | 3.60                | 14.5     | 2,828.5                            | -0.9     | 3.52                | 27.4     |
| Raising Minimum Pension                            |                                    |          |                     |          |                                    |          |                     |          |
| Minimum pension to SEK 80,000                      | 4,066.8                            | -0.8     | 3.08                | -2.1     | 2,586.5                            | -9.4     | 2.36                | -14.4    |
| Minimum pension to SEK 100,000                     | 4,001.7                            | -2.4     | 2.97                | -5.4     | 2,261.9                            | -20.7    | 2.01                | -27.1    |
| Mortality Reduction Scenarios                      |                                    |          |                     |          |                                    |          |                     |          |
| 10% less for all                                   | 4,260.6                            | 3.9      | 3.10                | -1.3     | 2,949.5                            | 3.4      | 2.75                | -0.4     |
| Lowest quintile 10% less, highest quintile 0% less | 3,987.4                            | -2.8     | 2.97                | -5.6     | 2,787.7                            | -2.3     | 2.65                | -3.9     |
| Lowest quintile 0% less, highest quintile 10% less | 4,373.8                            | 6.7      | 3.29                | 4.5      | 3,015.6                            | 5.7      | 2.86                | 3.6      |

*Notes:* For the 1925 cohort, the observed lifetime pensions are SEK 1,913,600 for men in the lowest quintile, SEK 6,014,100 for men in the highest quintile, SEK 1,621,400 for women in the lowest quintile, and SEK 4,475,200 for women in the highest quintile.

*Source:* Authors' calculation based on linked administrative data from Statistics Sweden.

<sup>a</sup> Units for absolute differences are in SEK 1,000  $\approx$  US\$125.

**Table A11** Distribution of marital status within income quintiles

|             | Men     |          |         |               | Women   |          |         |               |
|-------------|---------|----------|---------|---------------|---------|----------|---------|---------------|
|             | Married | Divorced | Widowed | Never Married | Married | Divorced | Widowed | Never Married |
| 1920 Cohort |         |          |         |               |         |          |         |               |
| Lowest      | 60.5%   | 8.2%     | 1.3%    | 30.0%         | 97.0%   | 0.6%     | 0.3%    | 2.1%          |
| Second      | 79.2%   | 4.8%     | 1.4%    | 14.7%         | 86.0%   | 4.0%     | 2.6%    | 7.4%          |
| Third       | 85.8%   | 4.2%     | 1.2%    | 8.8%          | 85.6%   | 4.6%     | 5.9%    | 3.9%          |
| Fourth      | 91.2%   | 3.1%     | 1.2%    | 4.5%          | 78.9%   | 9.0%     | 5.0%    | 7.1%          |
| Highest     | 94.6%   | 2.2%     | 0.9%    | 2.3%          | 61.3%   | 12.8%    | 9.7%    | 16.1%         |
| 1925 Cohort |         |          |         |               |         |          |         |               |
| Lowest      | 57.8%   | 11.8%    | 1.9%    | 28.5%         | 93.7%   | 1.6%     | 1.9%    | 2.8%          |
| Second      | 71.9%   | 9.7%     | 2.3%    | 16.1%         | 78.8%   | 7.4%     | 7.4%    | 6.4%          |
| Third       | 81.3%   | 8.2%     | 1.8%    | 8.6%          | 83.0%   | 8.2%     | 5.1%    | 3.6%          |
| Fourth      | 86.8%   | 6.8%     | 1.8%    | 4.6%          | 68.0%   | 15.7%    | 8.9%    | 7.4%          |
| Highest     | 90.3%   | 6.1%     | 1.6%    | 2.1%          | 54.4%   | 16.2%    | 15.3%   | 14.0%         |

*Notes:* Marital status was obtained from census data. The 1970 and 1980 census data were used for the 1920 and 1925 cohorts, respectively. Thus, marital status at age 50 was used for the 1920 cohort, and at age 55 was used for the 1925 cohort.

*Source:* Authors' calculation based on linked administrative data from Statistics Sweden.

### Section 3. Figures

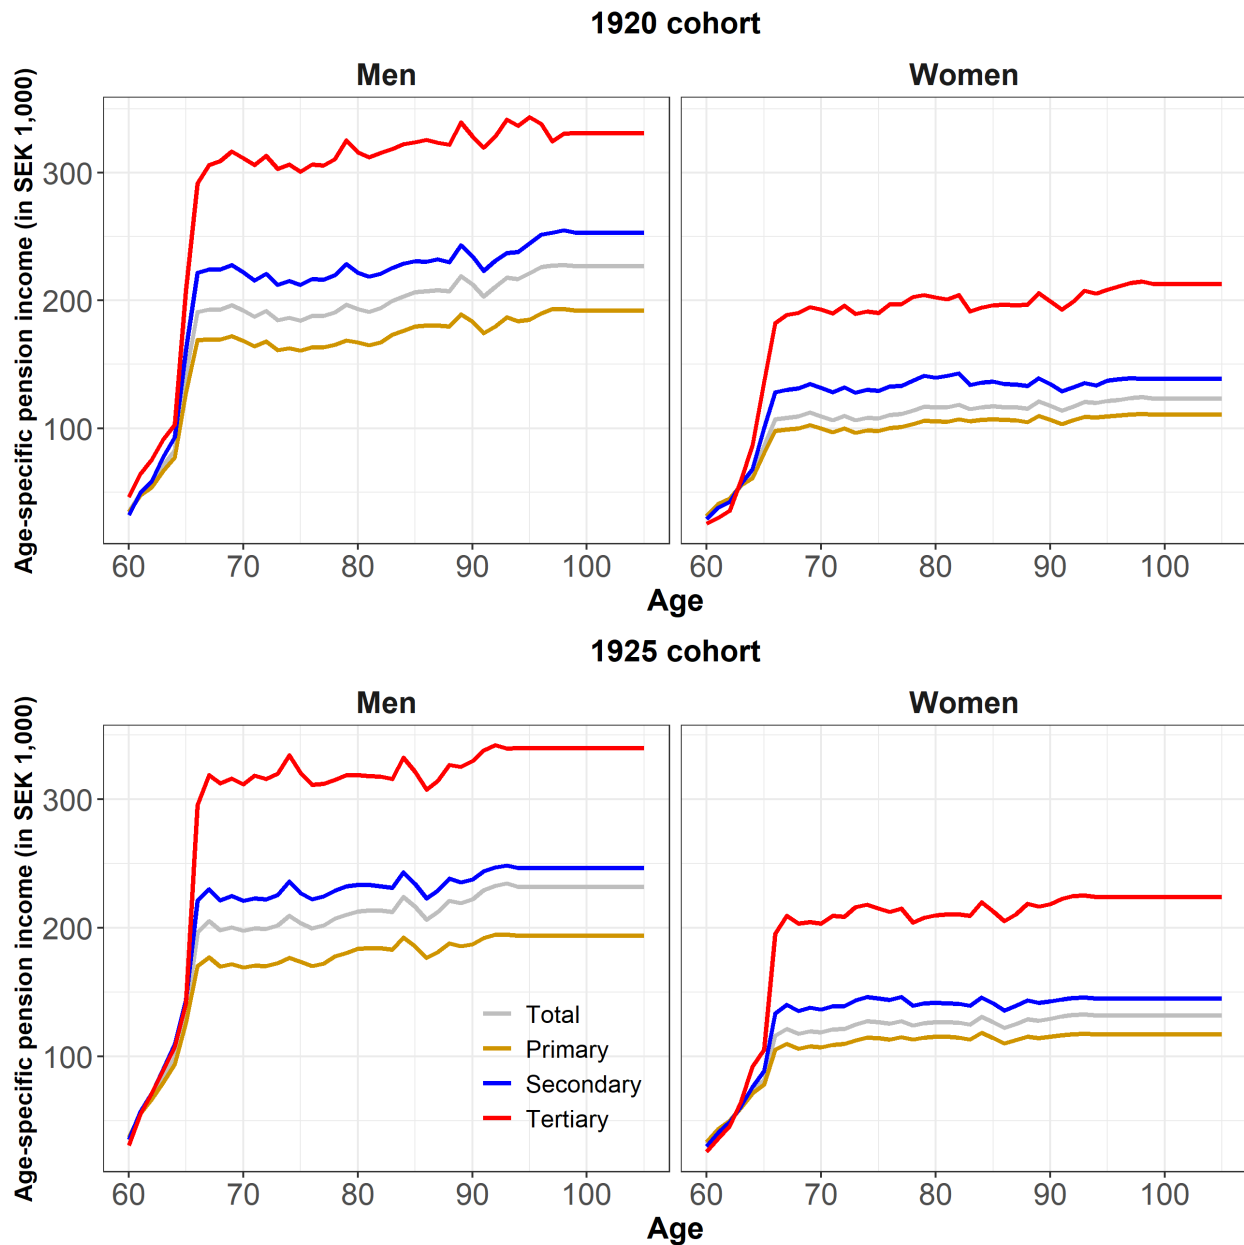

**Fig. A1** Age-specific average pension income by education. *Source:* Authors' calculation based on linked administrative data from Statistics Sweden.

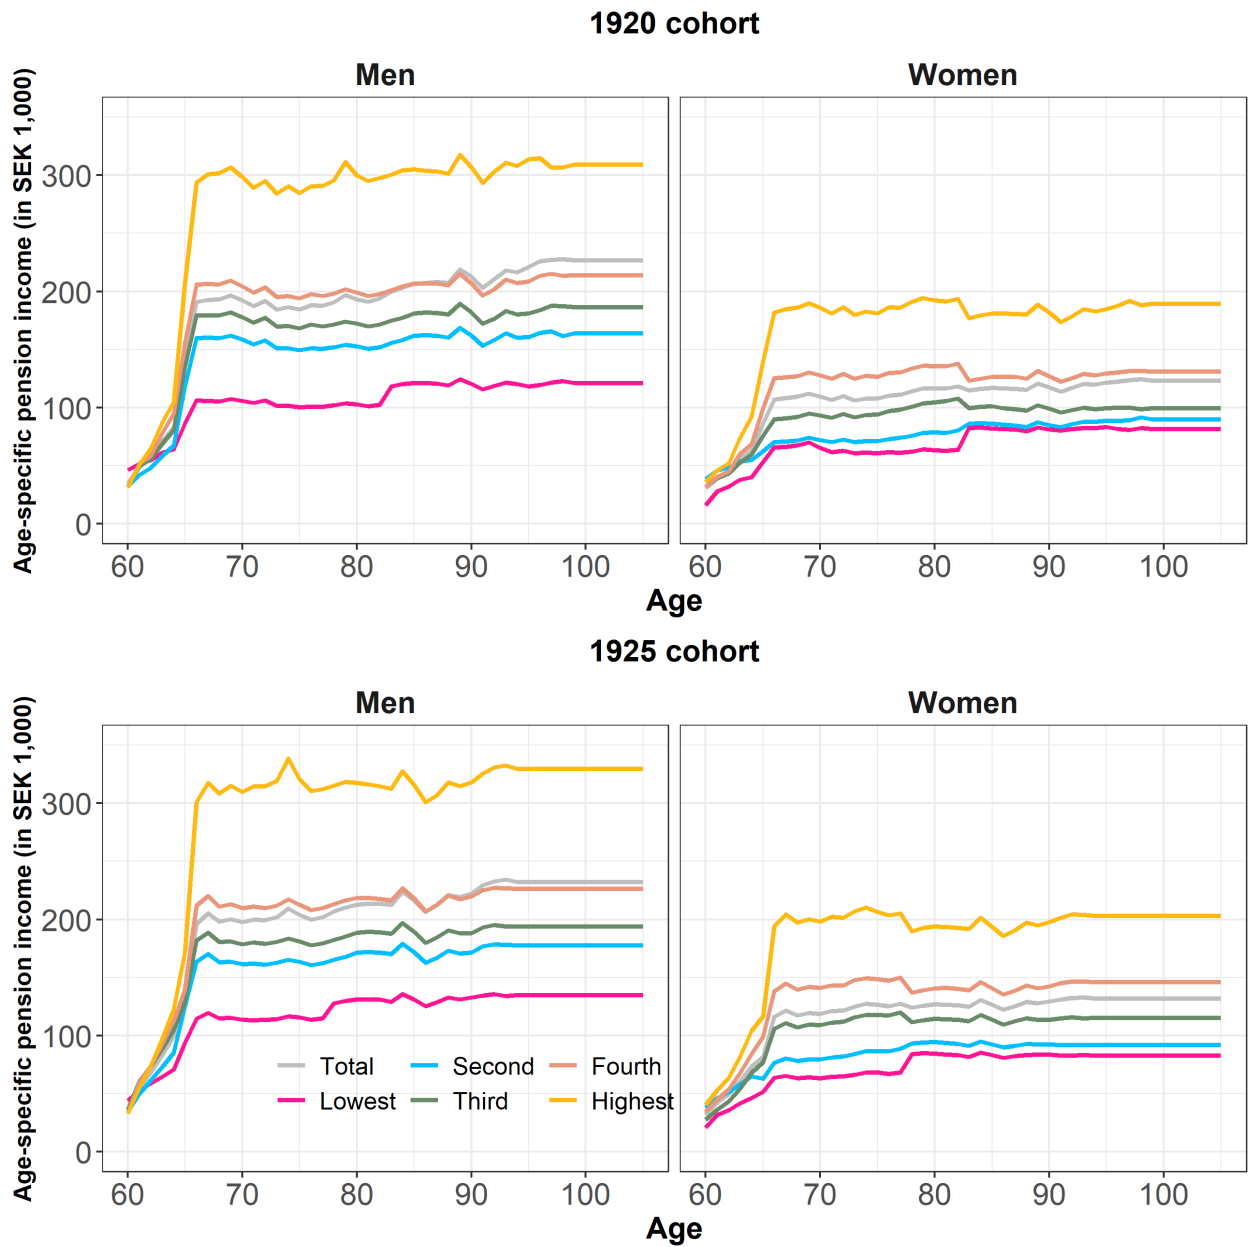

**Fig A2** Age-specific average pension income by earnings quintile. *Source:* Authors' calculation based on linked administrative data from Statistics Sweden.



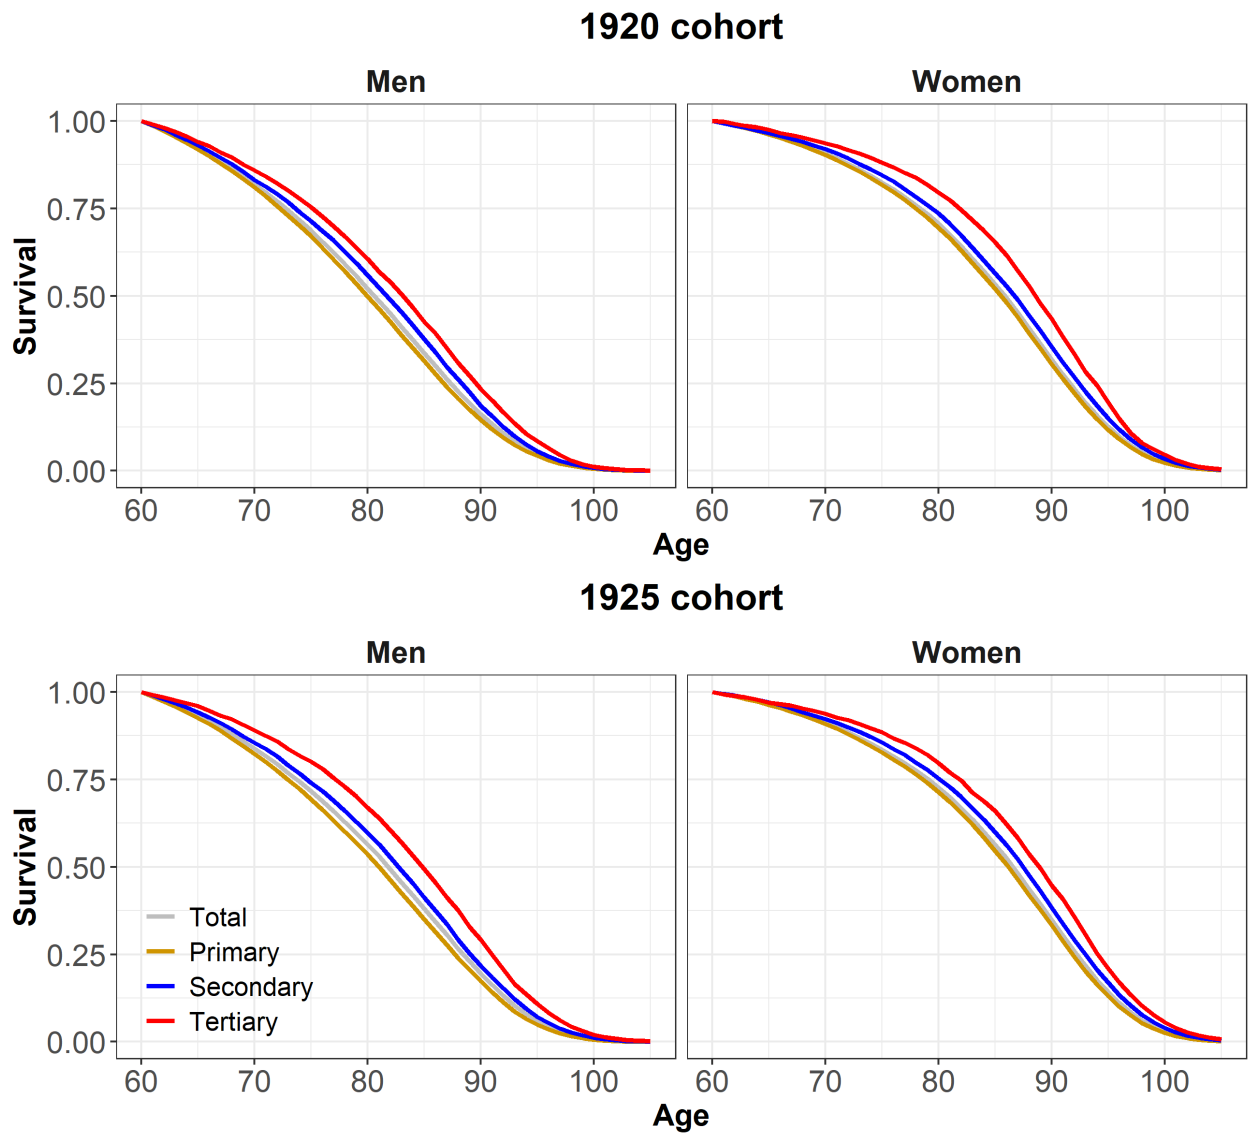

**Fig. A3** Survival curves by education. *Source:* Authors' calculation based on linked administrative data from Statistics Sweden.

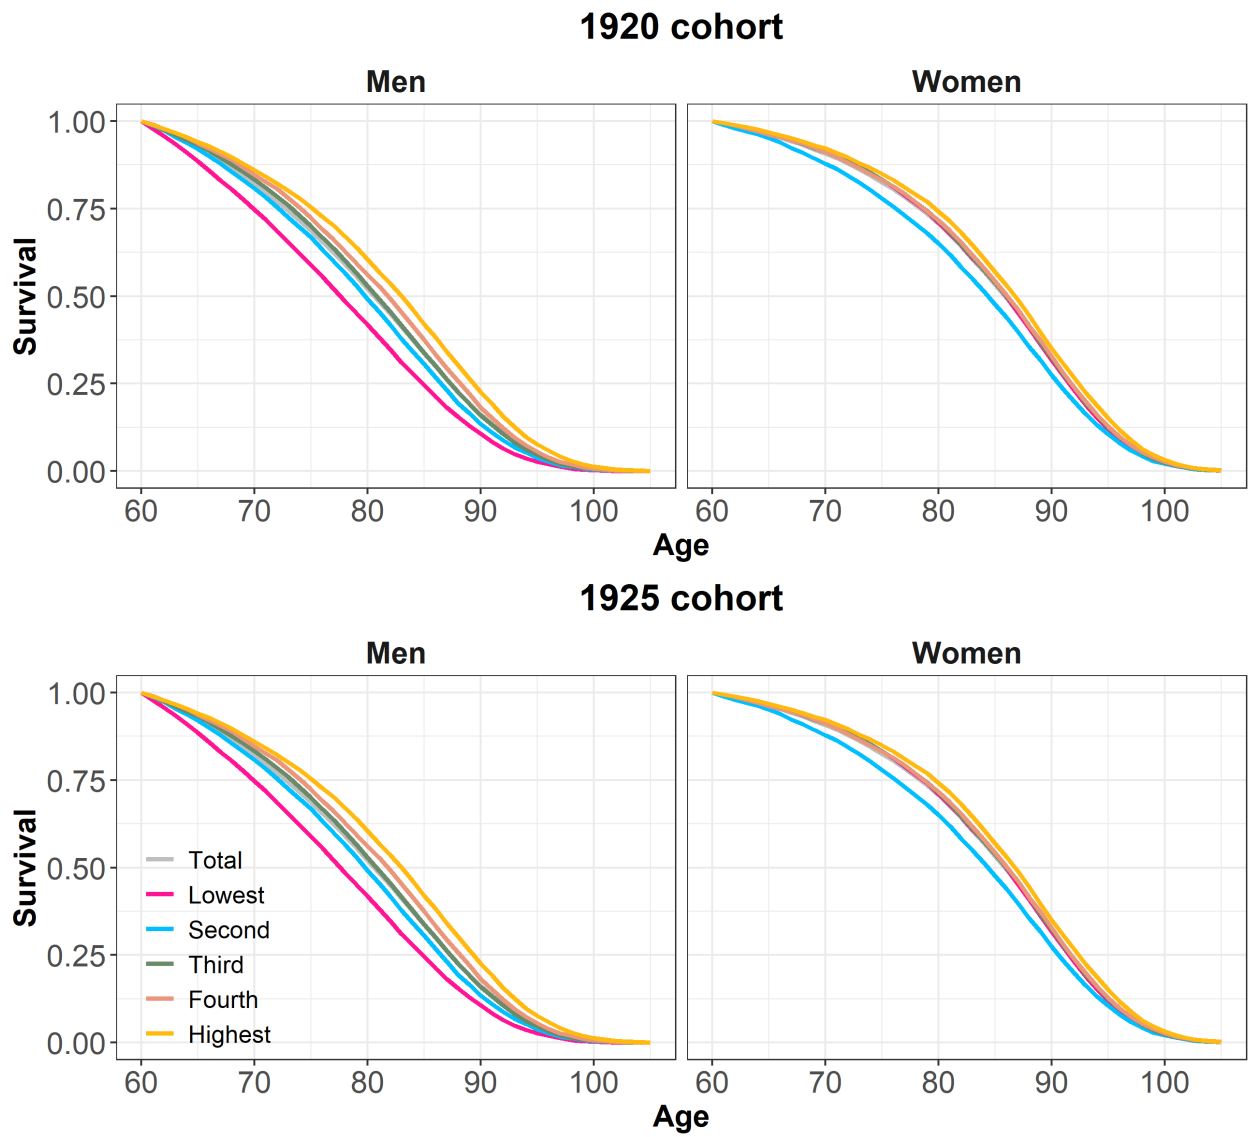

**Fig A4** Survival curves by income quintile. *Source:* Authors' calculation based on linked administrative data from Statistics Sweden.

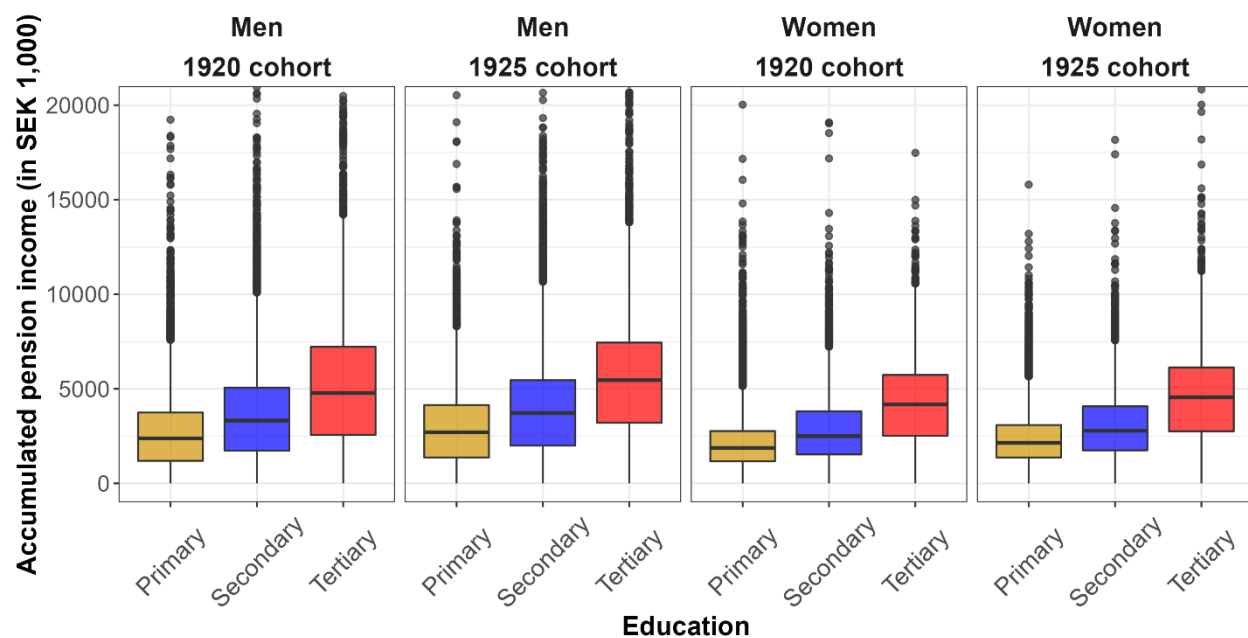

**Fig. A5** Boxplots of accumulated pension income until 2018, by education. *Source:* Authors' calculation based on linked administrative data from Statistics Sweden. *Notes:* Accumulated pension income is the sum of pension income from age 60 to 98 for the 1920 cohort, and from age 60 to 93 for the 1925 cohort. Outliers (dots) that are defined as above the  $Q3 + 1.5IQR$  are displayed. The y axis is truncated. Extreme outliers and the maximum are not shown.

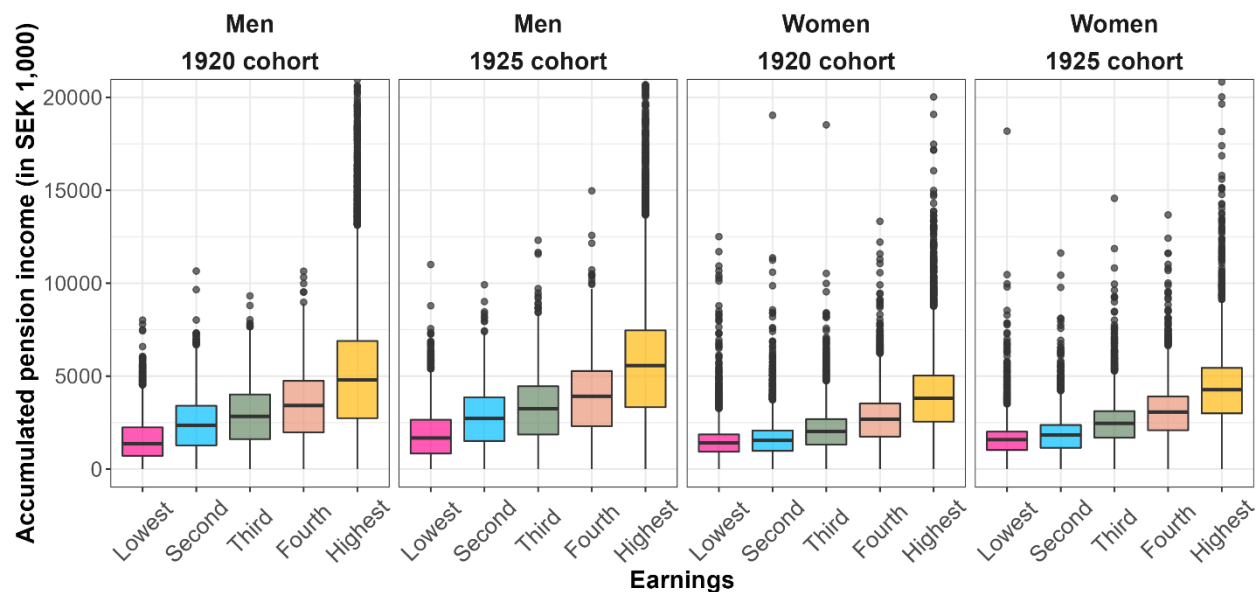

**Fig. A6** Boxplots of accumulated pension income until 2018, by earnings. *Source:* Authors' calculation based on linked administrative data from Statistics Sweden. *Notes:* Accumulated pension income is the sum of pension income from age 60 to 98 for the 1920 cohort, and from age 60 to 93 for the 1925 cohort. Outliers (dots) that are defined as above the  $Q3 + 1.5IQR$  are displayed. The y axis is truncated. Extreme outliers and the maximum are not shown.

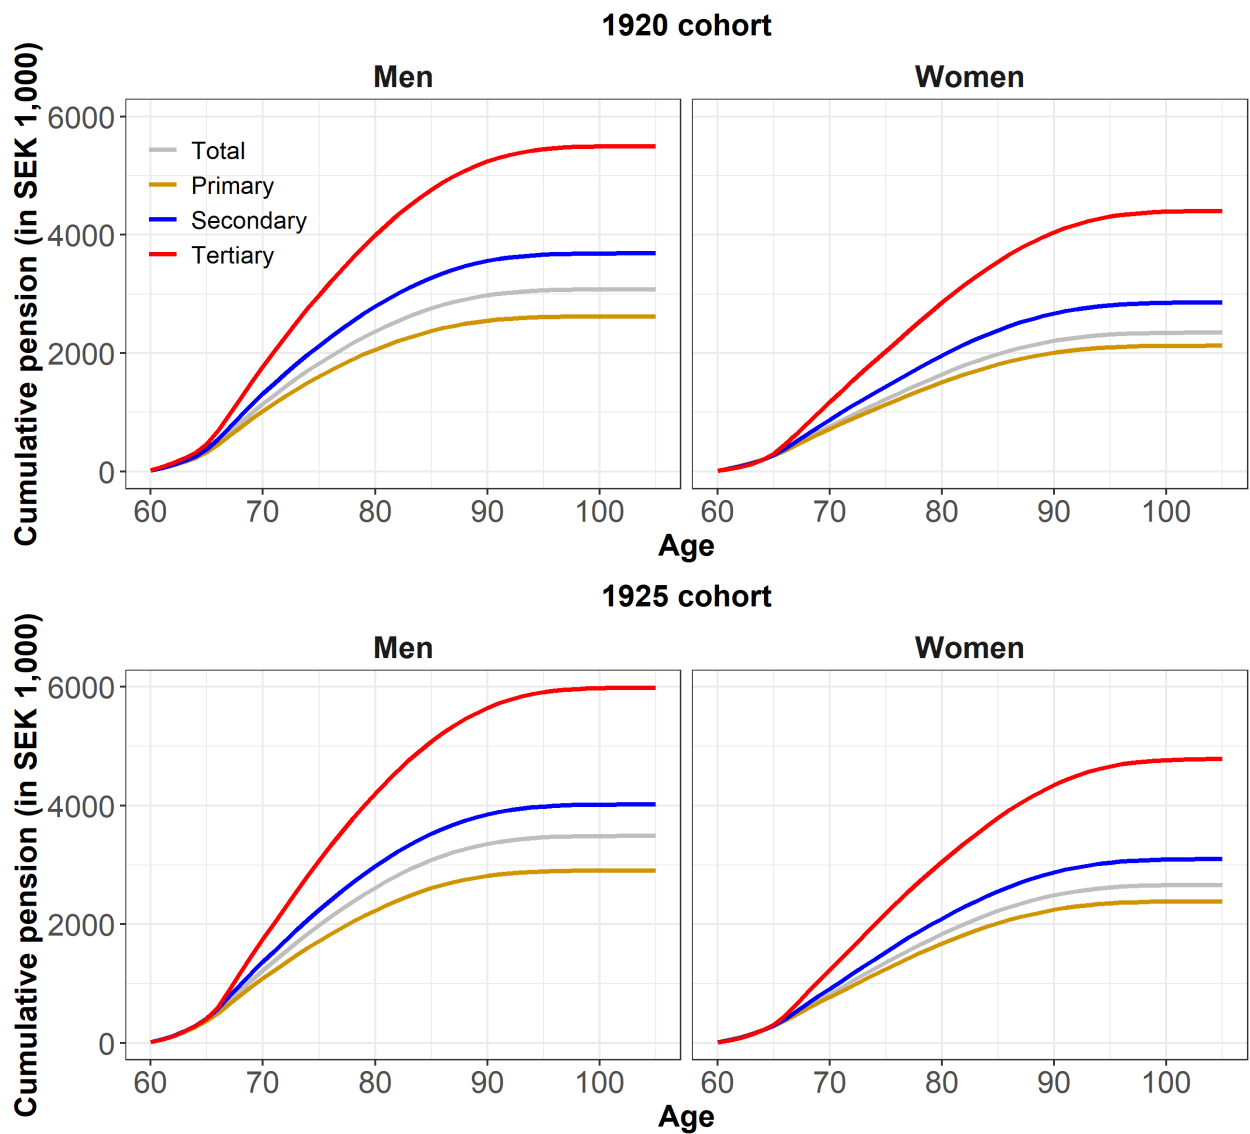

**Fig. A7** Age-specific cumulative pension income, by education. *Source:* Authors' calculation based on linked administrative data from Statistics Sweden. *Notes:* Age-specific average accumulated pension income refers to the expected value of pension between age 60 and  $x$  along the age axis. The values at the end points of the lines are equivalent to the values of group specific lifetime pension incomes.

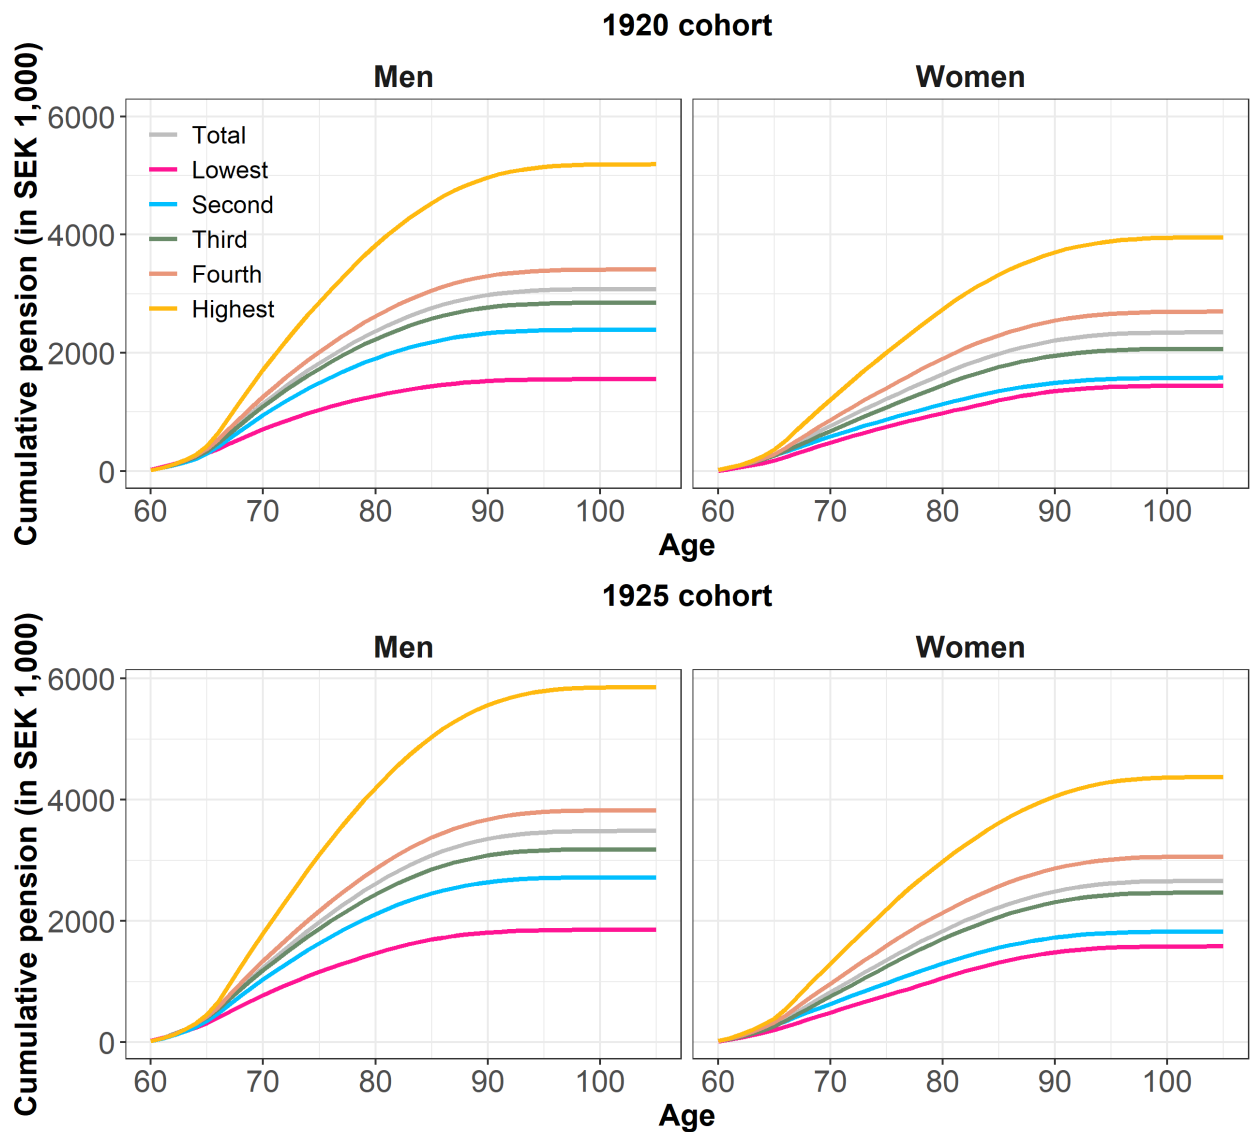

**Fig. A8** Age-specific cumulative pension income, by earnings. *Source:* Authors' calculation based on linked administrative data from Statistics Sweden. *Notes:* Age-specific average accumulated pension income refers to the expected value of pension between age 60 and  $x$  along the age axis. The values at the end points of the lines are equivalent to the values of group specific lifetime pension incomes.

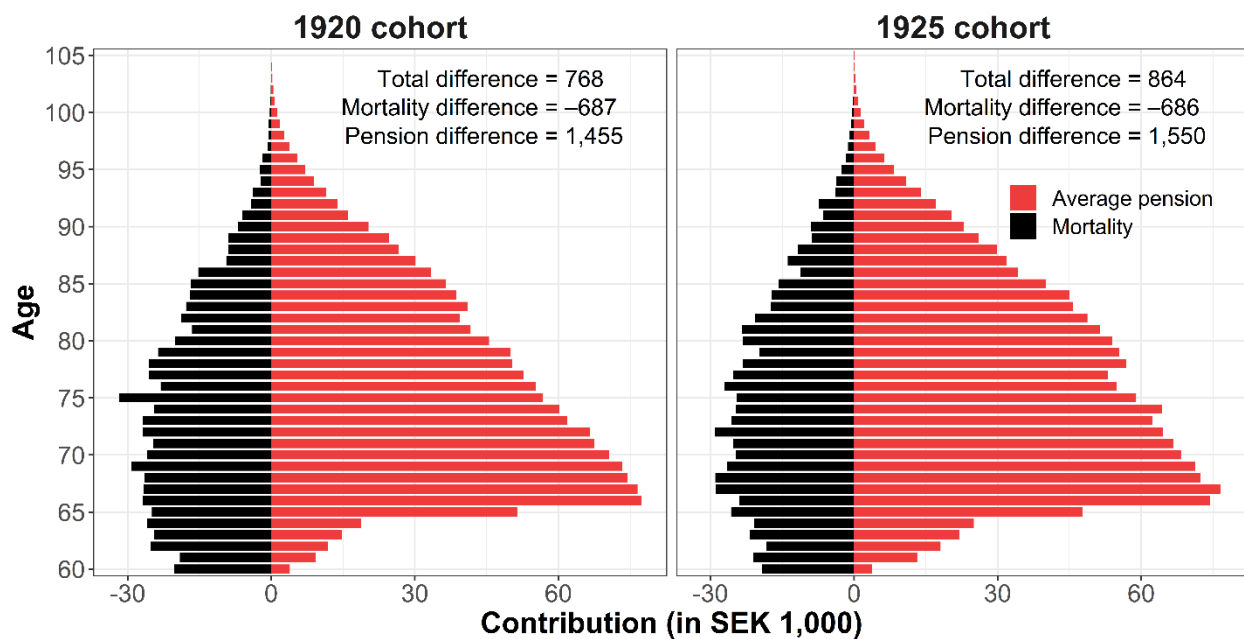

**Fig. A9** Decomposition of total lifetime pension differences between men and women into differences explained by mortality and yearly pension. SEK 1,000  $\approx$  US\$125. *Source:* Authors' calculation based on linked administrative data from Statistics Sweden.

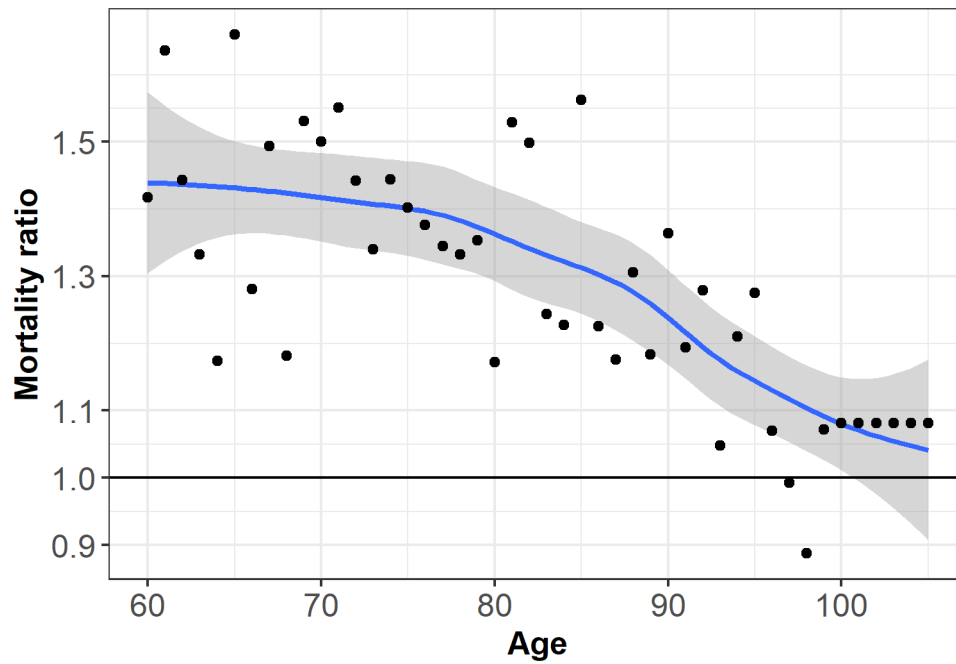

**Fig. A10** Mortality ratio between men with primary and tertiary education, 1920 cohort. *Source:* Authors' calculation based on linked administrative data from Statistics Sweden. *Note:* Mortality ratios above age 100 are assumed to be constant as the average over the last three years (i.e., ages 97–99). The smoothed line is estimated using loess regression.



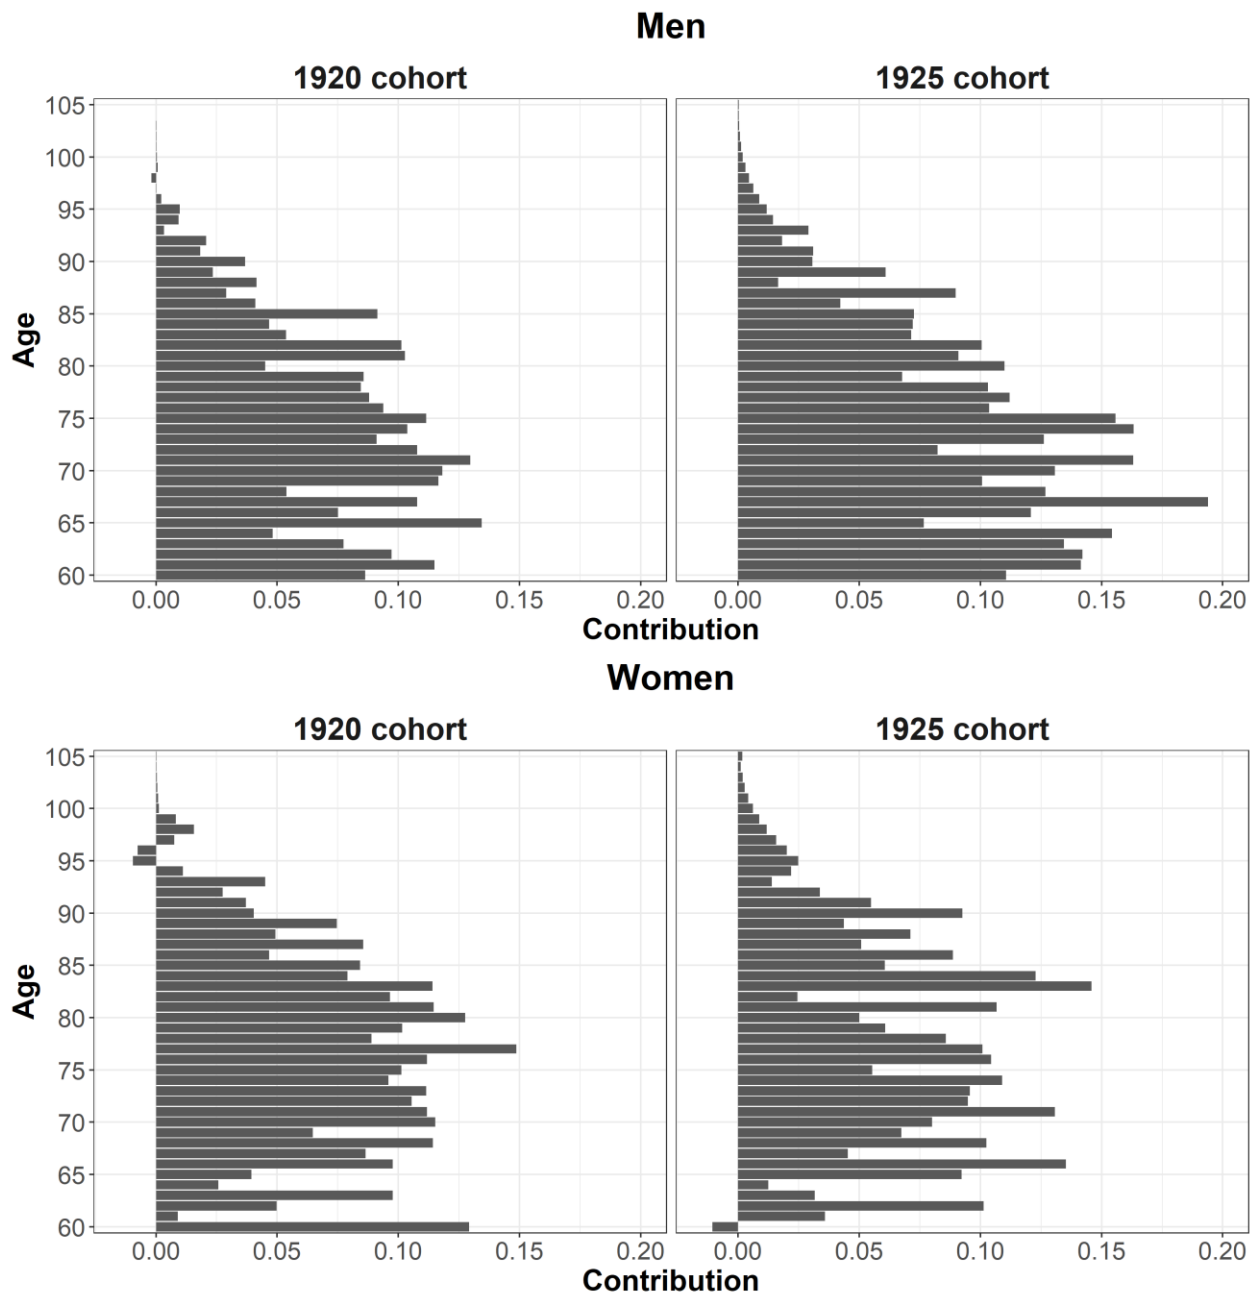

**Fig. A11** Decompositions of life expectancy ( $e_{60}$ ) differences between primary and tertiary education groups into differences explained by differences in age-specific mortality. *Source:* Authors' calculation based on linked administrative data from Statistics Sweden.

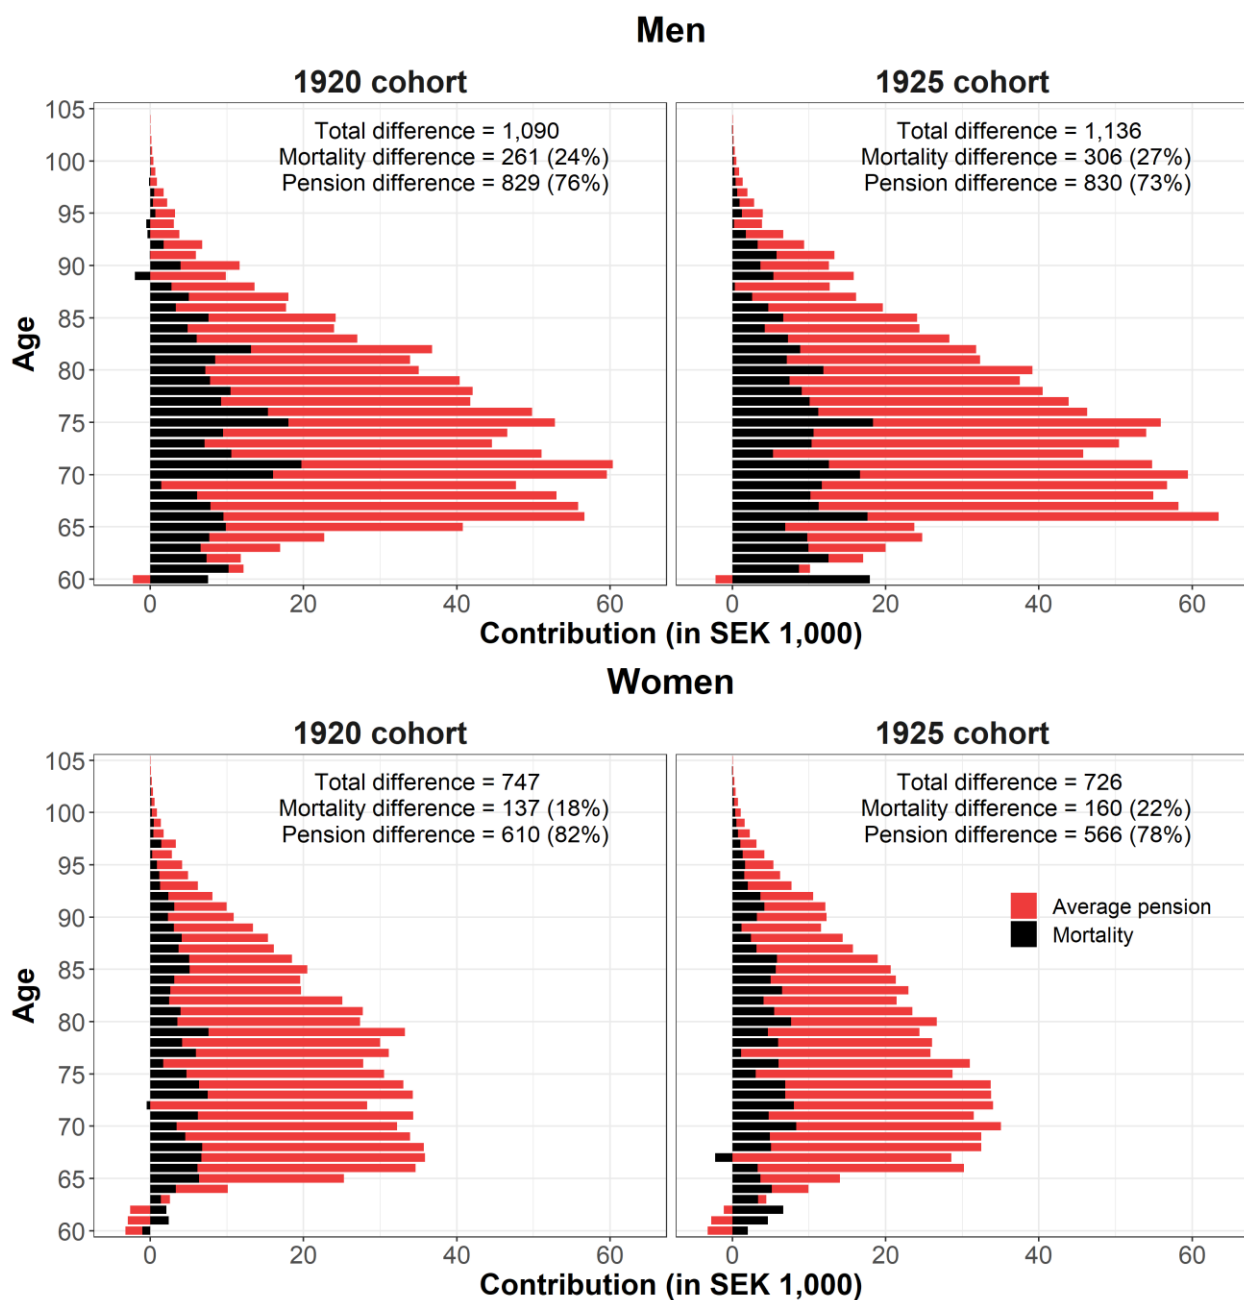

**Fig. A12** Decompositions of total lifetime pension differences between primary and secondary education groups into differences explained by mortality and yearly pension. SEK 1,000  $\approx$  US\$125. *Source:* Authors' calculation based on linked administrative data from Statistics Sweden.

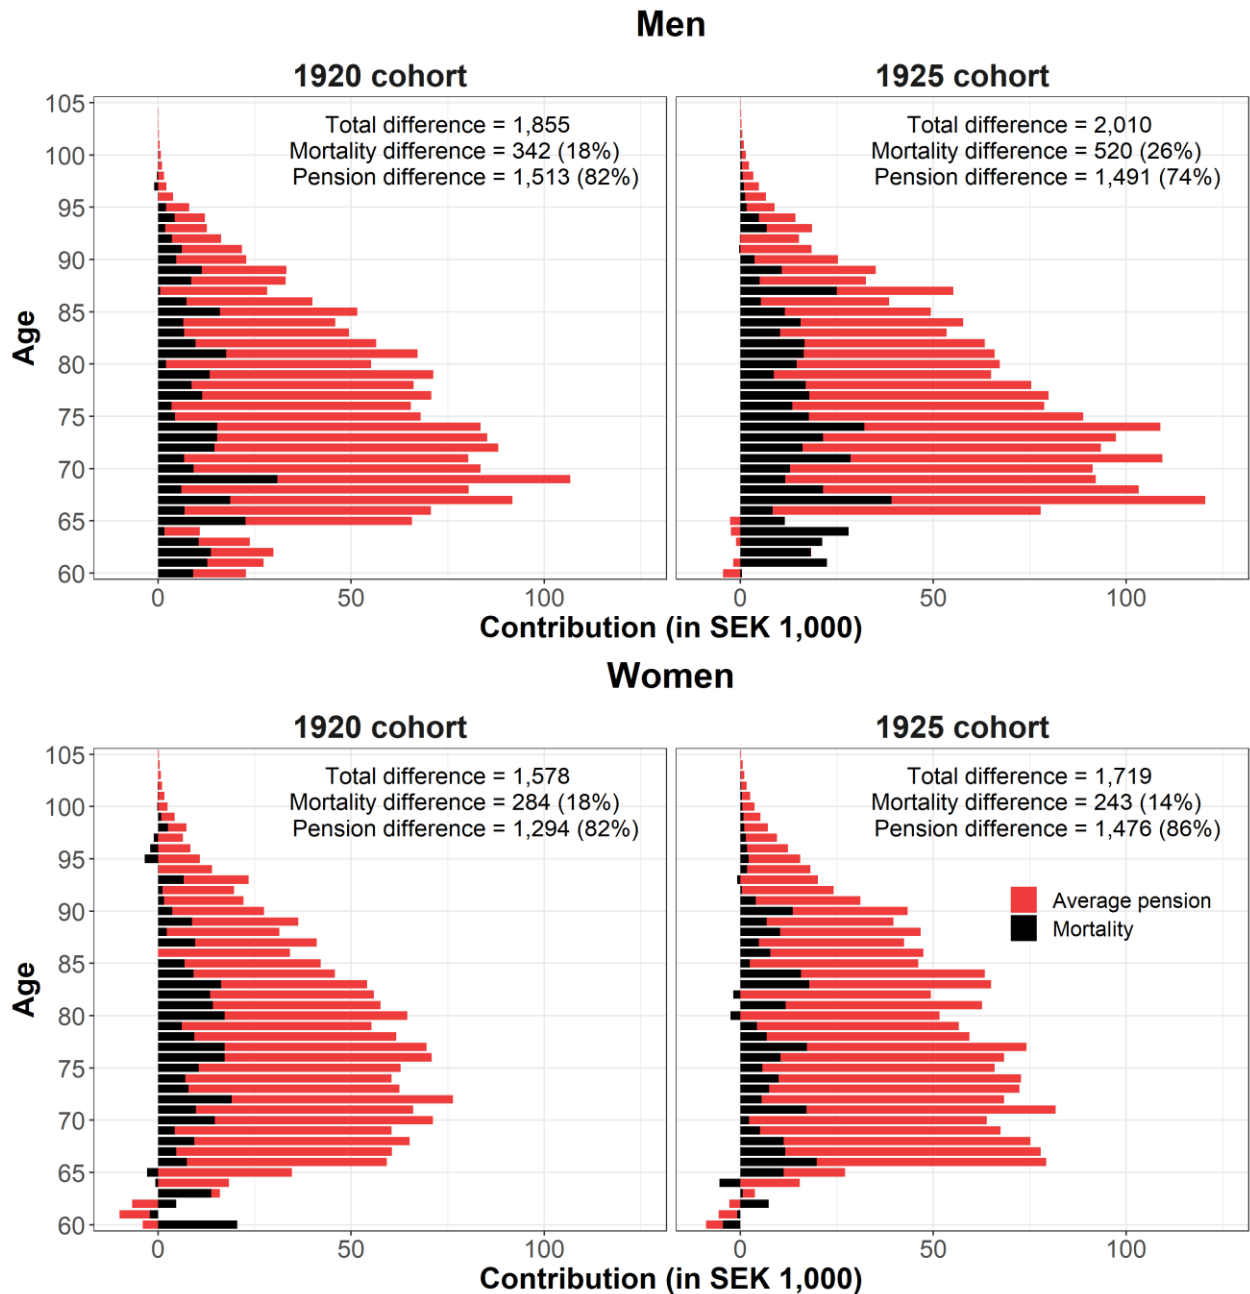

**Fig. A13** Decompositions of total lifetime pension differences between secondary and tertiary education groups into differences explained by mortality and yearly pension. SEK 1,000  $\approx$  US\$125. *Source:* Authors' calculation based on linked administrative data from Statistics Sweden.

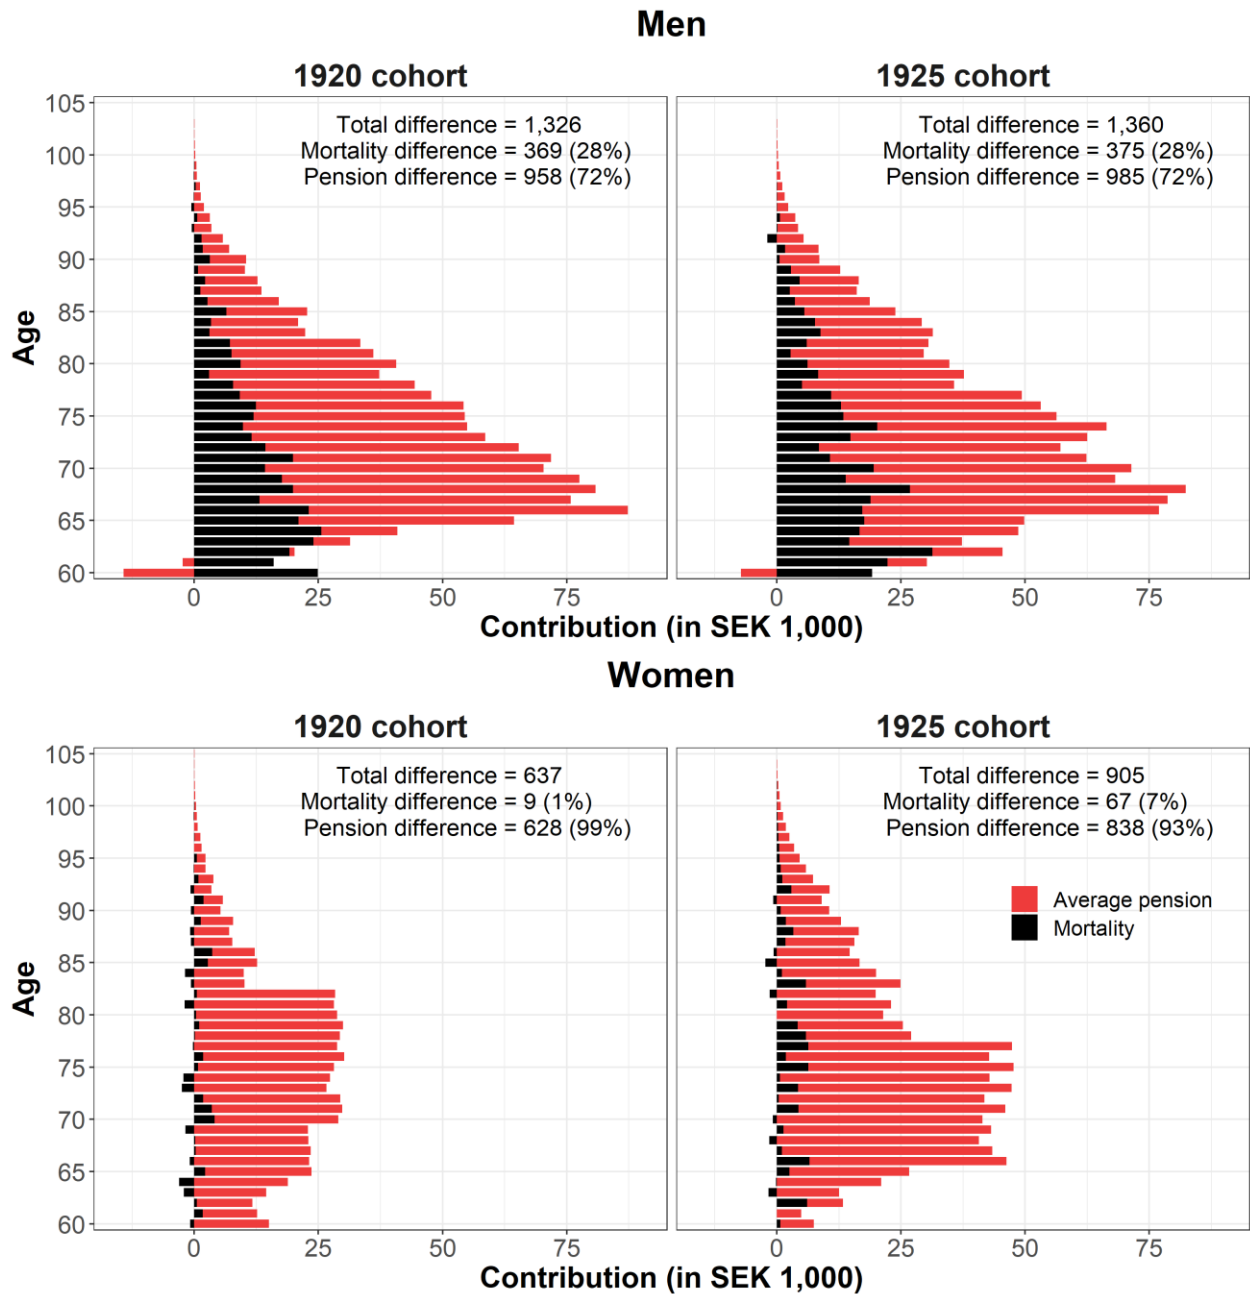

**Fig. A14** Decompositions of total lifetime pension differences between the lowest and the third earnings quintiles into differences explained by mortality and yearly pension. SEK 1,000  $\approx$  US\$125. *Source:* Authors' calculation based on linked administrative data from Statistics Sweden.

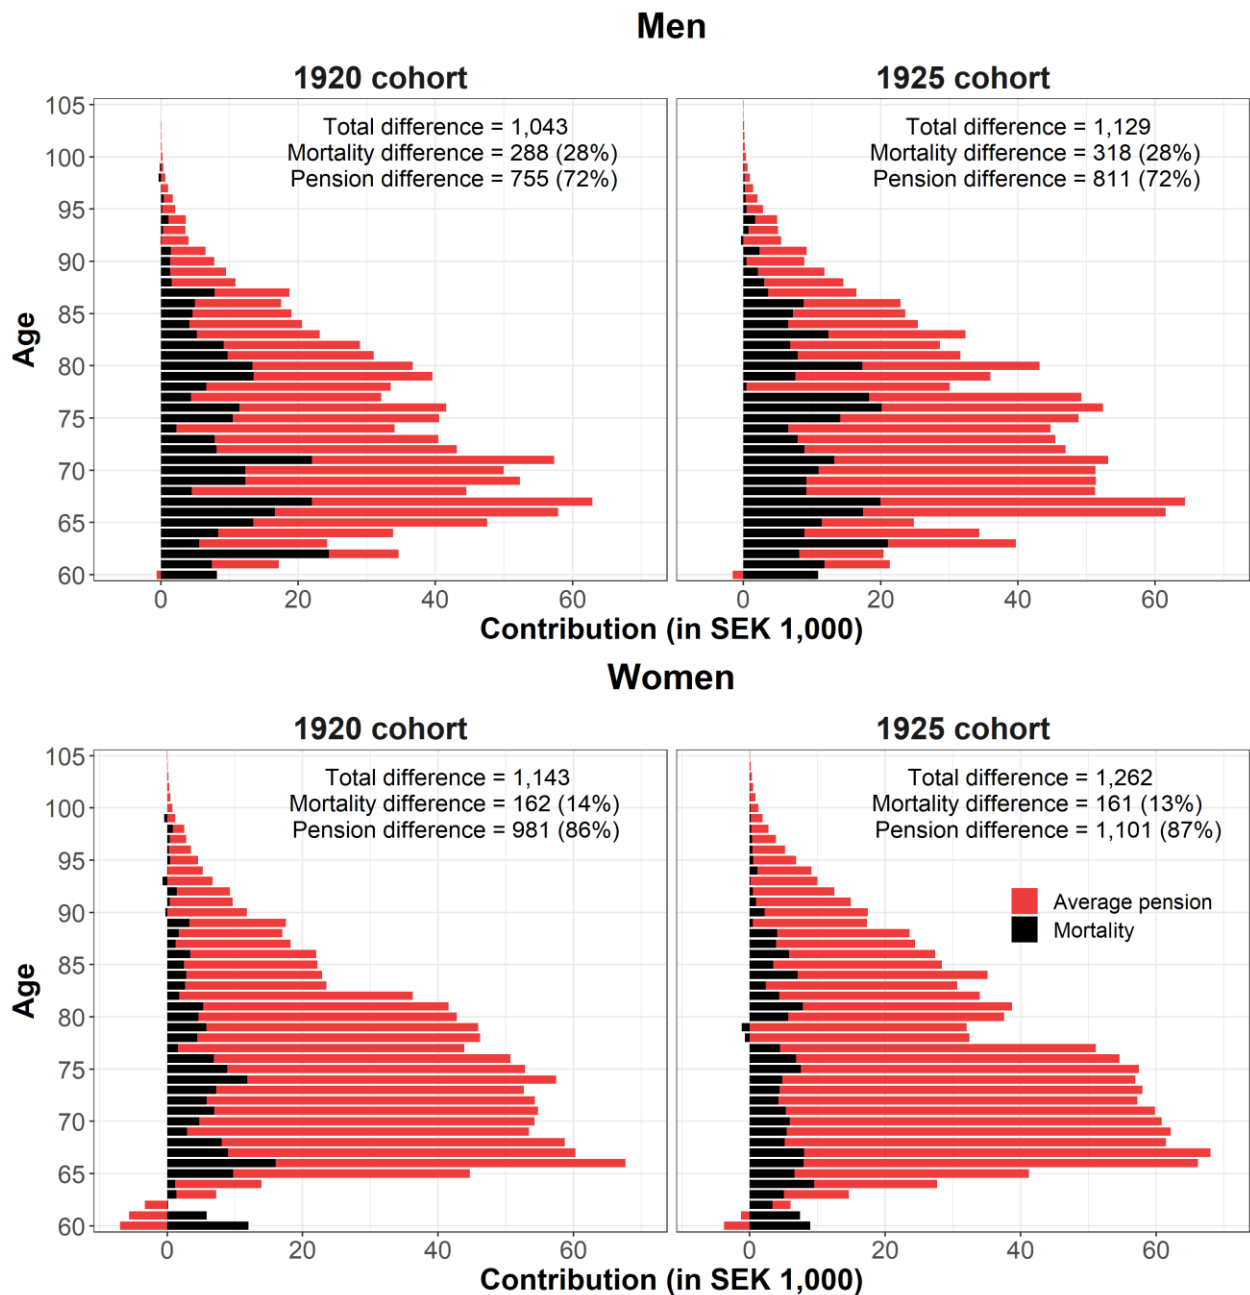

**Fig. A15** Decompositions of total lifetime pension differences between the second and the fourth earnings quintiles into differences explained by mortality and yearly pension. SEK 1,000  $\approx$  US\$125. *Source:* Authors' calculation based on linked administrative data from Statistics Sweden.

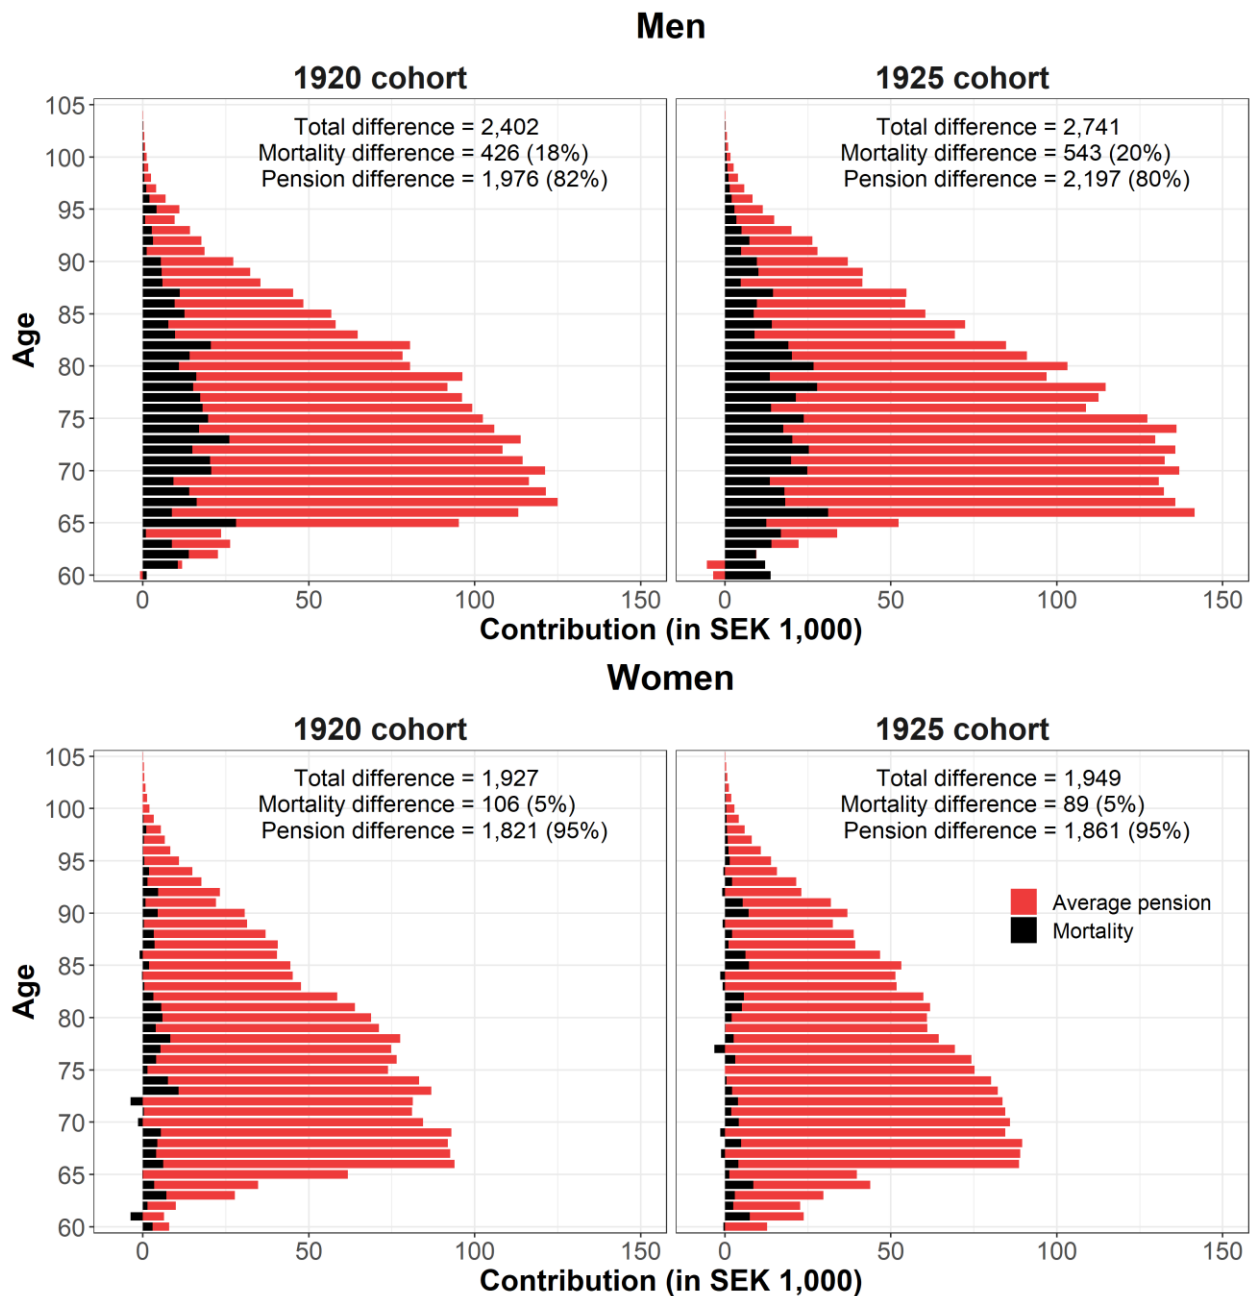

**Fig. A16** Decompositions of total lifetime pension differences between the third and the highest earnings quintiles into differences explained by mortality and yearly pension. SEK 1,000  $\approx$  US\$125. *Source:* Authors' calculation based on linked administrative data from Statistics Sweden.

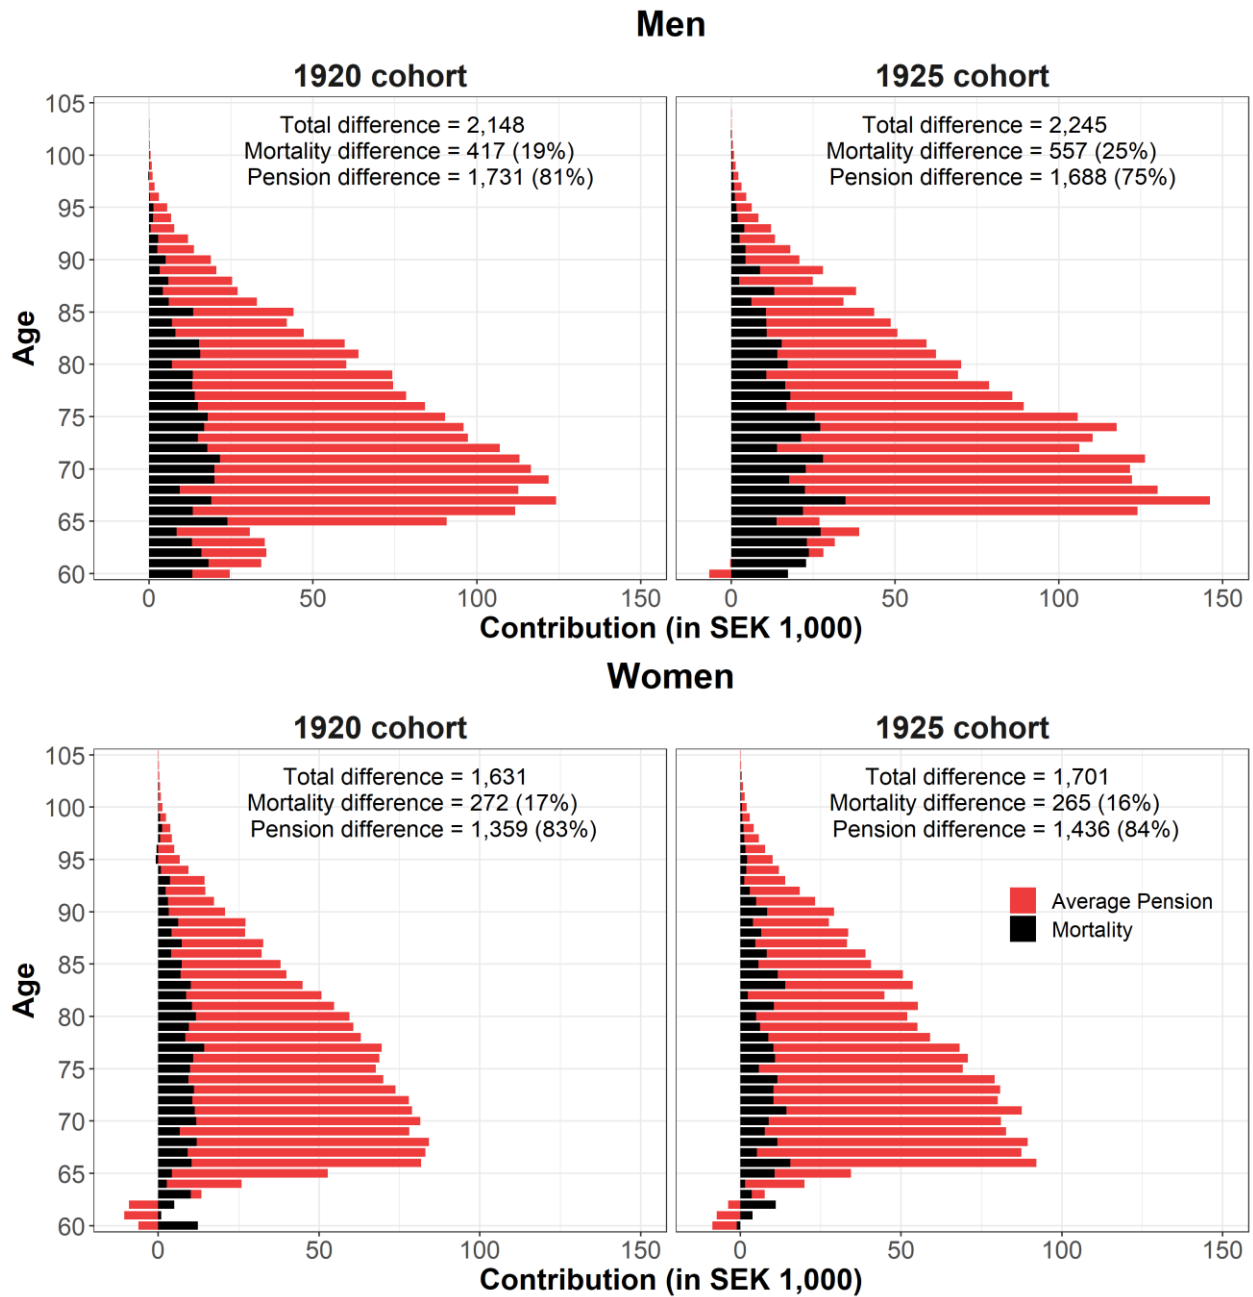

**Fig. A17** Decomposition of total lifetime pension differences between primary and tertiary education groups into differences explained by mortality and yearly pension, with a 2% discount rate. SEK 1,000  $\approx$  US\$125. *Source:* Authors' calculation based on linked administrative data from Statistics Sweden.

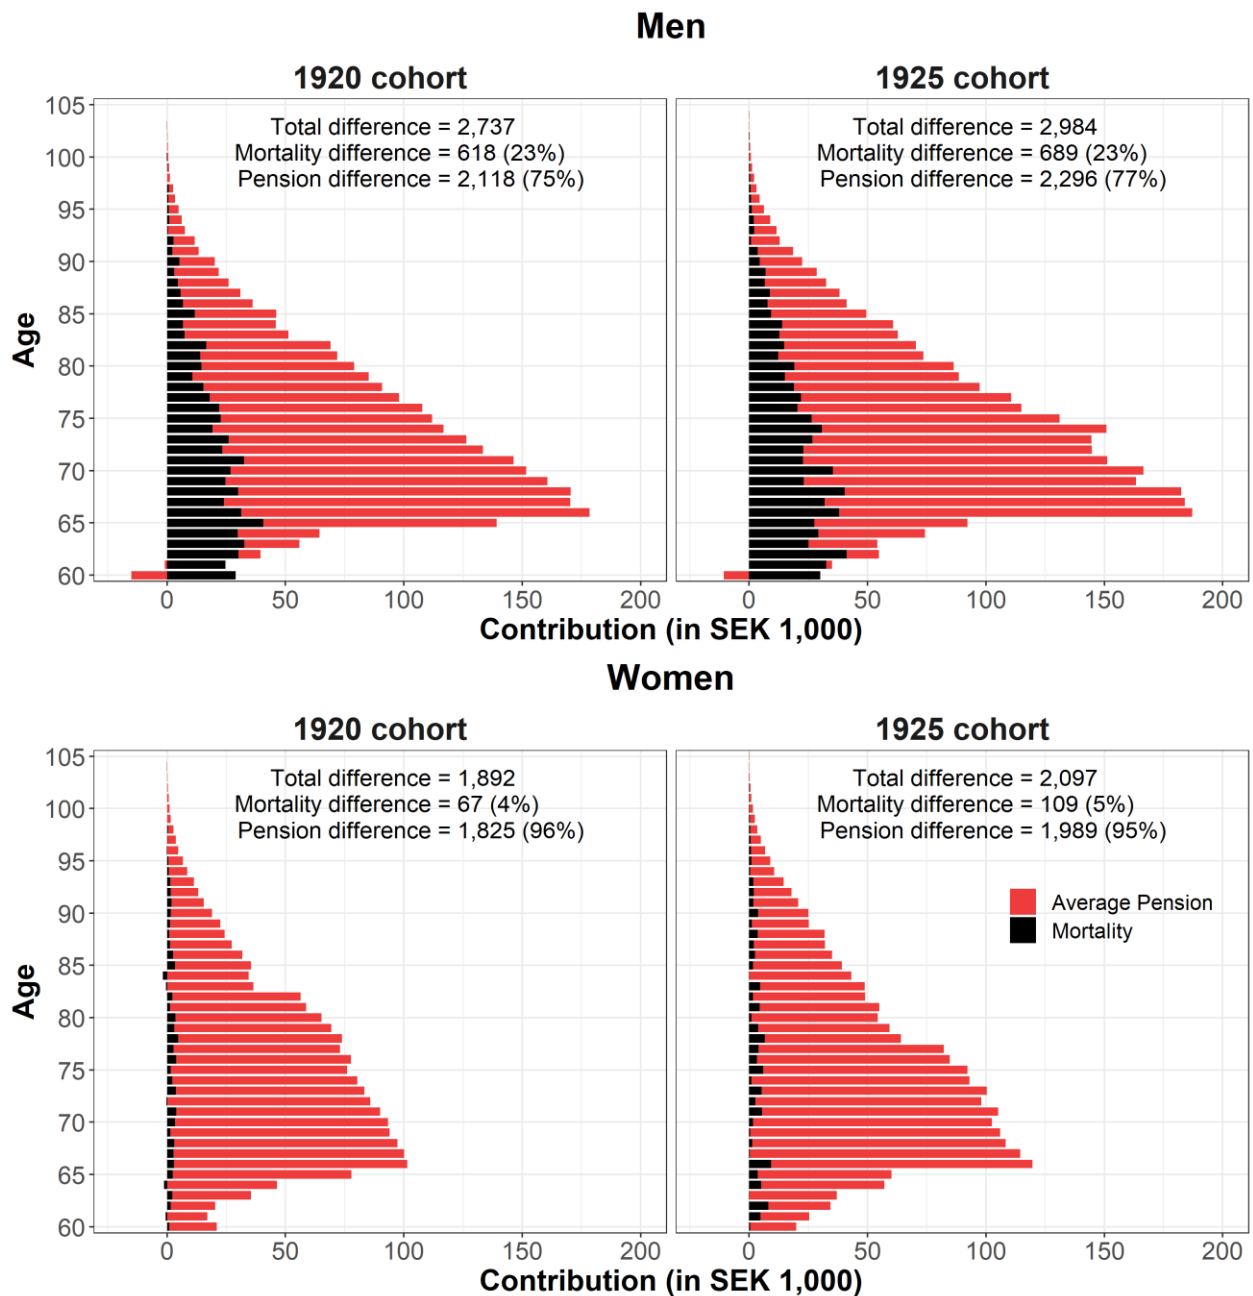

**Fig. A18** Decomposition of total lifetime pension differences between the bottom and the top earnings quintile groups into differences explained by mortality and yearly pension, with a 2% discount rate. SEK 1,000  $\approx$  US\$125. *Source:* Authors' calculation based on linked administrative data from Statistics Sweden.
